# Supplementary material
Source: publisher figshare collection journal article supplement (https://tandf.figshare.com/articles/dataset/_/11357588)
Supplement: Supplementary file 1 [file 1]

| Detrital components of sandstone samples |               |                |                  |     |    |     |     |     |     |    |     |     |     |       |
|------------------------------------------|---------------|----------------|------------------|-----|----|-----|-----|-----|-----|----|-----|-----|-----|-------|
| No.                                      | Sample number | Lithology      | Formation        | Qm  | Qp | Qt  | P   | K   | F   | Lv | Lsm | L   | Lt  | total |
| 1                                        | 080902-b1     | Meta-sandstone | ∈                | 300 | 0  | 300 | 1   | 0   | 1   | 0  | 0   | 0   | 0   | 301   |
| 2                                        | 080903-b1     | Meta-sandstone | ∈                | 300 | 0  | 300 | 0   | 0   | 0   | 0  | 0   | 0   | 0   | 300   |
| 3                                        | 081101-b1     | Meta-sandstone | ∈                | 250 | 3  | 253 | 60  | 52  | 112 | 10 | 7   | 17  | 20  | 382   |
| 4                                        | 081801-b1     | Meta-sandstone | ∈                | 217 | 55 | 272 | 7   | 82  | 89  | 5  | 26  | 31  | 86  | 392   |
| 5                                        | 080406-b1     | sandstone      | T <sub>3</sub> m | 128 | 6  | 134 | 19  | 91  | 110 | 57 | 36  | 93  | 99  | 337   |
| 6                                        | 080602-b1     | sandstone      | T <sub>3</sub> m | 153 | 7  | 160 | 21  | 118 | 139 | 34 | 20  | 54  | 61  | 353   |
| 7                                        | 081003-b1     | sandstone      | T <sub>3</sub> m | 89  | 2  | 91  | 210 | 3   | 213 | 2  | 0   | 2   | 4   | 306   |
| 8                                        | 080801-b1     | sandstone      | K <sub>1</sub> s | 254 | 64 | 318 | 0   | 0   | 0   | 33 | 18  | 51  | 115 | 369   |
| 9                                        | 080801-b2     | sandstone      | K <sub>1</sub> s | 252 | 38 | 290 | 0   | 0   | 0   | 49 | 13  | 62  | 100 | 352   |
| 10                                       | 081105-b1     | sandstone      | K <sub>1</sub> s | 115 | 59 | 174 | 19  | 9   | 28  | 21 | 82  | 103 | 162 | 305   |
| 11                                       | 081301-b1     | sandstone      | K <sub>1</sub> s | 246 | 81 | 327 | 0   | 1   | 1   | 0  | 0   | 0   | 81  | 328   |
| 12                                       | 081302-b1     | sandstone      | K <sub>1</sub> s | 99  | 42 | 141 | 61  | 10  | 71  | 15 | 121 | 136 | 178 | 348   |
| 13                                       | 081306-b1     | sandstone      | K <sub>1</sub> d | 155 | 37 | 192 | 46  | 55  | 101 | 5  | 25  | 30  | 67  | 323   |
| 14                                       | 081401-b1     | sandstone      | K <sub>1</sub> d | 138 | 6  | 144 | 59  | 20  | 79  | 31 | 47  | 78  | 84  | 301   |
| 15                                       | 081502-b1     | sandstone      | K <sub>1</sub> d | 264 | 14 | 278 | 11  | 1   | 12  | 14 | 27  | 41  | 55  | 331   |
| 16                                       | 081802-b1     | sandstone      | K <sub>1</sub> d | 246 | 9  | 255 | 0   | 0   | 0   | 16 | 55  | 71  | 80  | 326   |
| 17                                       | 173101-b1     | sandstone      | K <sub>2</sub> a | 201 | 44 | 245 | 0   | 0   | 0   | 94 | 53  | 147 | 191 | 392   |
| 18                                       | 080304-b1     | sandstone      | K <sub>2</sub> a | 139 | 23 | 162 | 0   | 5   | 5   | 17 | 132 | 149 | 172 | 316   |
| 19                                       | 081004-b1     | sandstone      | K <sub>2</sub> a | 159 | 29 | 188 | 0   | 8   | 8   | 31 | 114 | 145 | 174 | 341   |
| 20                                       | 081005-b1     | sandstone      | K <sub>2</sub> a | 207 | 31 | 238 | 0   | 14  | 14  | 23 | 101 | 124 | 155 | 376   |
| 21                                       | 081006-b1     | sandstone      | K <sub>2</sub> a | 218 | 21 | 239 | 0   | 0   | 0   | 20 | 139 | 159 | 180 | 398   |
| 22                                       | 160801-b1     | siltstone      | K <sub>2</sub> a | 189 | 53 | 242 | 35  | 1   | 36  | 6  | 52  | 58  | 111 | 336   |
| 23                                       | 160802-b1     | sandstone      | K <sub>2</sub> a | 195 | 60 | 255 | 0   | 24  | 24  | 21 | 37  | 58  | 118 | 337   |
