# Supplementary material
Source: publisher figshare collection journal article supplement (https://tandf.figshare.com/articles/dataset/_/11357588)
Supplement: Supplementary file 2 [file 1]

## LA-ICPMS U-Pb zircon age data

| Sample        | Isotopic ratios                      |          |                                     |          |                                     |          | Corrected ages (Ma)                  |    |                                     |    |                                     |    | Used Age | 1σ |
|---------------|--------------------------------------|----------|-------------------------------------|----------|-------------------------------------|----------|--------------------------------------|----|-------------------------------------|----|-------------------------------------|----|----------|----|
|               | <sup>207</sup> Pb/ <sup>206</sup> Pb | 1σ       | <sup>207</sup> Pb/ <sup>235</sup> U | 1σ       | <sup>206</sup> Pb/ <sup>238</sup> U | 1σ       | <sup>207</sup> Pb/ <sup>206</sup> Pb | 1σ | <sup>207</sup> Pb/ <sup>235</sup> U | 1σ | <sup>206</sup> Pb/ <sup>238</sup> U | 1σ |          |    |
| 081801-RZ1(€) |                                      |          |                                     |          |                                     |          |                                      |    |                                     |    |                                     |    |          |    |
| 081801-RZ1-22 | 0.074954                             | 0.001070 | 1.676996                            | 0.027735 | 0.161494                            | 0.001257 | 1133                                 | 29 | 1000                                | 11 | 965                                 | 7  | 965      | 7  |
| 081801-RZ1-60 | 0.071589                             | 0.000928 | 1.632973                            | 0.023221 | 0.164929                            | 0.001404 | 976                                  | 32 | 983                                 | 9  | 984                                 | 8  | 984      | 8  |
| 081801-RZ1-10 | 0.077705                             | 0.001095 | 1.780925                            | 0.027831 | 0.165958                            | 0.001411 | 1139                                 | 29 | 1039                                | 10 | 990                                 | 8  | 990      | 8  |
| 081801-RZ1-31 | 0.075054                             | 0.000882 | 1.726281                            | 0.022985 | 0.166354                            | 0.001206 | 1070                                 | 19 | 1018                                | 9  | 992                                 | 7  | 992      | 7  |
| 081801-RZ1-28 | 0.073491                             | 0.000870 | 1.698101                            | 0.022488 | 0.167202                            | 0.001330 | 1028                                 | 24 | 1008                                | 8  | 997                                 | 7  | 997      | 7  |
| 081801-RZ1-47 | 0.073019                             | 0.001130 | 1.722641                            | 0.028764 | 0.170865                            | 0.001485 | 1015                                 | 36 | 1017                                | 11 | 1017                                | 8  | 1015     | 36 |
| 081801-RZ1-08 | 0.073032                             | 0.001030 | 1.699155                            | 0.025913 | 0.168346                            | 0.001267 | 1017                                 | 28 | 1008                                | 10 | 1003                                | 7  | 1017     | 28 |
| 081801-RZ1-53 | 0.073642                             | 0.001029 | 1.725785                            | 0.025304 | 0.169742                            | 0.001429 | 1031                                 | 29 | 1018                                | 9  | 1011                                | 8  | 1031     | 29 |
| 081801-RZ1-30 | 0.074466                             | 0.000883 | 1.747526                            | 0.025073 | 0.169816                            | 0.001598 | 1054                                 | 24 | 1026                                | 9  | 1011                                | 9  | 1054     | 24 |
| 081801-RZ1-55 | 0.075792                             | 0.001574 | 2.067823                            | 0.048598 | 0.196591                            | 0.001873 | 1100                                 | 42 | 1138                                | 16 | 1157                                | 10 | 1100     | 42 |
| 081801-RZ1-13 | 0.076686                             | 0.000885 | 2.177162                            | 0.028521 | 0.205622                            | 0.001673 | 1122                                 | 22 | 1174                                | 9  | 1205                                | 9  | 1122     | 22 |
| 081801-RZ1-16 | 0.077258                             | 0.001109 | 1.960076                            | 0.030953 | 0.183779                            | 0.001711 | 1128                                 | 34 | 1102                                | 11 | 1088                                | 9  | 1128     | 34 |
| 081801-RZ1-58 | 0.078205                             | 0.001221 | 2.085223                            | 0.032867 | 0.192840                            | 0.001330 | 1154                                 | 31 | 1144                                | 11 | 1137                                | 7  | 1154     | 31 |
| 081801-RZ1-19 | 0.078555                             | 0.001115 | 2.339830                            | 0.036981 | 0.216356                            | 0.002509 | 1161                                 | 28 | 1224                                | 11 | 1263                                | 13 | 1161     | 28 |
| 081801-RZ1-23 | 0.078646                             | 0.000997 | 1.935797                            | 0.036037 | 0.178358                            | 0.002814 | 1165                                 | 25 | 1094                                | 12 | 1058                                | 15 | 1165     | 25 |
| 081801-RZ1-57 | 0.078788                             | 0.001189 | 2.175856                            | 0.036245 | 0.199564                            | 0.001809 | 1169                                 | 31 | 1173                                | 12 | 1173                                | 10 | 1169     | 31 |
| 081801-RZ1-21 | 0.078894                             | 0.001008 | 2.229240                            | 0.033796 | 0.204220                            | 0.001806 | 1169                                 | 25 | 1190                                | 11 | 1198                                | 10 | 1169     | 25 |
| 081801-RZ1-49 | 0.078925                             | 0.001282 | 2.346993                            | 0.041219 | 0.215284                            | 0.001950 | 1170                                 | 64 | 1227                                | 13 | 1257                                | 10 | 1170     | 64 |
| 081801-RZ1-18 | 0.078959                             | 0.001103 | 2.136685                            | 0.032910 | 0.195775                            | 0.001602 | 1172                                 | 28 | 1161                                | 11 | 1153                                | 9  | 1172     | 28 |
| 081801-RZ1-59 | 0.079106                             | 0.001394 | 2.248955                            | 0.041872 | 0.205798                            | 0.001901 | 1176                                 | 35 | 1196                                | 13 | 1206                                | 10 | 1176     | 35 |
| 081801-RZ1-56 | 0.079445                             | 0.001323 | 2.022924                            | 0.033145 | 0.184323                            | 0.001299 | 1183                                 | 33 | 1123                                | 11 | 1091                                | 7  | 1183     | 33 |
| 081801-RZ1-38 | 0.079609                             | 0.000902 | 2.014916                            | 0.023947 | 0.183344                            | 0.001118 | 1187                                 | 22 | 1121                                | 8  | 1085                                | 6  | 1187     | 22 |
| 081801-RZ1-12 | 0.079735                             | 0.000953 | 2.170639                            | 0.031870 | 0.197009                            | 0.001869 | 1191                                 | 24 | 1172                                | 10 | 1159                                | 10 | 1191     | 24 |
| 081801-RZ1-07 | 0.079837                             | 0.001068 | 2.183531                            | 0.030443 | 0.198059                            | 0.001418 | 1194                                 | 27 | 1176                                | 10 | 1165                                | 8  | 1194     | 27 |
| 081801-RZ1-43 | 0.079855                             | 0.000927 | 2.111833                            | 0.028095 | 0.191429                            | 0.001420 | 1194                                 | 23 | 1153                                | 9  | 1129                                | 8  | 1194     | 23 |
| 081801-RZ1-54 | 0.080066                             | 0.001059 | 2.199396                            | 0.035180 | 0.198599                            | 0.001985 | 1198                                 | 31 | 1181                                | 11 | 1168                                | 11 | 1198     | 31 |
| 081801-RZ1-27 | 0.080376                             | 0.001082 | 2.269011                            | 0.035240 | 0.204148                            | 0.001851 | 1206                                 | 22 | 1203                                | 11 | 1198                                | 10 | 1206     | 22 |
| 081801-RZ1-04 | 0.080460                             | 0.000951 | 2.232281                            | 0.028994 | 0.200666                            | 0.001367 | 1209                                 | 23 | 1191                                | 9  | 1179                                | 7  | 1209     | 23 |
| 081801-RZ1-50 | 0.081167                             | 0.001230 | 2.285775                            | 0.037364 | 0.203784                            | 0.001749 | 1226                                 | 30 | 1208                                | 12 | 1196                                | 9  | 1226     | 30 |
| 081801-RZ1-02 | 0.081235                             | 0.001125 | 2.254405                            | 0.033477 | 0.200799                            | 0.001555 | 1228                                 | 27 | 1198                                | 10 | 1180                                | 8  | 1228     | 27 |
| 081801-RZ1-20 | 0.081427                             | 0.001143 | 2.275541                            | 0.035413 | 0.202158                            | 0.001637 | 1231                                 | 27 | 1205                                | 11 | 1187                                | 9  | 1231     | 27 |
| 081801-RZ1-32 | 0.081118                             | 0.001667 | 2.089672                            | 0.039537 | 0.187436                            | 0.002049 | 1233                                 | 41 | 1145                                | 13 | 1107                                | 11 | 1233     | 41 |
| 081801-RZ1-51 | 0.081567                             | 0.001428 | 2.334270                            | 0.044067 | 0.207423                            | 0.002025 | 1235                                 | 1  | 1223                                | 13 | 1215                                | 11 | 1235     | 1  |
| 081801-RZ1-34 | 0.081669                             | 0.001083 | 2.240493                            | 0.030169 | 0.199227                            | 0.001761 | 1239                                 | 26 | 1194                                | 9  | 1171                                | 9  | 1239     | 26 |
| 081801-RZ1-25 | 0.082249                             | 0.001101 | 2.411166                            | 0.036827 | 0.212044                            | 0.002102 | 1252                                 | 26 | 1246                                | 11 | 1240                                | 11 | 1252     | 26 |
| 081801-RZ1-41 | 0.082258                             | 0.001150 | 2.149215                            | 0.033190 | 0.189047                            | 0.001378 | 1252                                 | 23 | 1165                                | 11 | 1116                                | 7  | 1252     | 23 |
| 081801-RZ1-06 | 0.082301                             | 0.001560 | 2.389559                            | 0.056278 | 0.208929                            | 0.001869 | 1254                                 | 42 | 1239                                | 17 | 1223                                | 10 | 1254     | 42 |
| 081801-RZ1-61 | 0.082026                             | 0.001103 | 2.657558                            | 0.043195 | 0.234133                            | 0.002508 | 1256                                 | 26 | 1317                                | 12 | 1356                                | 13 | 1256     | 26 |
| 081801-RZ1-14 | 0.082760                             | 0.001041 | 2.634240                            | 0.045575 | 0.229969                            | 0.002671 | 1265                                 | 25 | 1310                                | 13 | 1334                                | 14 | 1265     | 25 |
| 081801-RZ1-39 | 0.080218                             | 0.001320 | 2.180104                            | 0.037514 | 0.191711                            | 0.001747 | 1267                                 | 33 | 1175                                | 12 | 1160                                | 9  | 1267     | 33 |
| 081801-RZ1-33 | 0.080172                             | 0.001411 | 2.001994                            | 0.035073 | 0.180862                            | 0.001167 | 1267                                 | 34 | 1116                                | 12 | 1072                                | 6  | 1267     | 34 |
| 081801-RZ1-37 | 0.084222                             | 0.001196 | 2.852126                            | 0.064340 | 0.243645                            | 0.003735 | 1298                                 | 27 | 1369                                | 17 | 1406                                | 19 | 1298     | 27 |
| 081801-RZ1-45 | 0.084652                             | 0.001028 | 2.628696                            | 0.044806 | 0.224071                            | 0.002390 | 1309                                 | 24 | 1309                                | 13 | 1303                                | 13 | 1309     | 24 |
| 081801-RZ1-36 | 0.085697                             | 0.000938 | 2.476580                            | 0.030557 | 0.209261                            | 0.001493 | 1331                                 | 22 | 1265                                | 9  | 1225                                | 8  | 1331     | 22 |
| 081801-RZ1-03 | 0.085964                             | 0.001033 | 2.308726                            | 0.034573 | 0.194060                            | 0.001798 | 1339                                 | 24 | 1215                                | 11 | 1143                                | 10 | 1339     | 24 |
| 081801-RZ1-01 | 0.086133                             | 0.001465 | 2.680809                            | 0.055354 | 0.224439                            | 0.002222 | 1343                                 | 32 | 1323                                | 15 | 1305                                | 12 | 1343     | 32 |
| 081801-RZ1-29 | 0.086142                             | 0.001088 | 2.623402                            | 0.037230 | 0.220251                            | 0.001651 | 1343                                 | 25 | 1307                                | 10 | 1283                                | 9  | 1343     | 25 |
| 081801-RZ1-62 | 0.087951                             | 0.001466 | 3.020892                            | 0.056913 | 0.247717                            | 0.002037 | 1381                                 | 31 | 1413                                | 14 | 1427                                | 11 | 1381     | 31 |
| 081801-RZ1-46 | 0.088737                             | 0.001049 | 2.939164                            | 0.035746 | 0.239890                            | 0.001486 | 1398                                 | 22 | 1392                                | 9  | 1386                                | 8  | 1398     | 22 |
| 081801-RZ1-09 | 0.089195                             | 0.001278 | 2.894655                            | 0.046763 | 0.234733                            | 0.001929 | 1409                                 | 27 | 1381                                | 12 | 1359                                | 10 | 1409     | 27 |
| 081801-RZ1-35 | 0.089685                             | 0.000983 | 2.918509                            | 0.037737 | 0.235584                            | 0.001871 | 1420                                 | 21 | 1387                                | 10 | 1364                                | 10 | 1420     | 21 |
| 081801-RZ1-44 | 0.090999                             | 0.001099 | 3.227131                            | 0.045855 | 0.257232                            | 0.002603 | 1447                                 | 18 | 1464                                | 11 | 1476                                | 13 | 1447     | 18 |
| 081801-RZ1-05 | 0.096752                             | 0.001348 | 3.621572                            | 0.049463 | 0.272052                            | 0.002604 | 1563                                 | 26 | 1554                                | 11 | 1551                                | 13 | 1563     | 26 |
| 081801-RZ1-40 | 0.096926                             | 0.001240 | 3.374679                            | 0.047166 | 0.252135                            | 0.001859 | 1566                                 | 24 | 1499                                | 11 | 1449                                | 10 | 1566     | 24 |
| 081801-RZ1-11 | 0.098196                             | 0.001247 | 3.529785                            | 0.050780 | 0.259978                            | 0.001963 | 1591                                 | 24 | 1534                                | 11 | 1490                                | 10 | 1591     | 24 |
| 081801-RZ1-63 | 0.098645                             | 0.001259 | 3.920568                            | 0.055801 | 0.287247                            | 0.002486 | 1598                                 | 29 | 1618                                | 12 | 1628                                | 12 | 1598     | 29 |
| 081801-RZ1-26 | 0.102637                             | 0.001232 | 3.935803                            | 0.048228 | 0.277398                            | 0.001864 | 1673                                 | 22 | 1621                                | 10 | 1578                                | 9  | 1673     | 22 |
| 081801-RZ1-24 | 0.103047                             | 0.001321 | 3.901616                            | 0.059398 | 0.273464                            | 0.002607 | 1680                                 | 23 | 1614                                | 12 | 1558                                | 13 | 1680     | 23 |
| 081801-RZ1-48 | 0.105668                             | 0.001573 | 4.524891                            | 0.076342 | 0.309762                            | 0.002841 | 1728                                 | 28 | 1736                                | 14 | 1740                                | 14 | 1728     | 28 |
| 081801-RZ1-64 | 0.127646                             | 0.001639 | 6.658932                            | 0.094077 | 0.376651                            | 0.002846 | 2066                                 | 23 | 2067                                | 13 | 2061                                | 13 | 2066     | 23 |
| 081801-RZ1-15 | 0.143968                             | 0.001770 | 8.838341                            | 0.121767 | 0.4444                              |          |                                      |    |                                     |    |                                     |    |          |    |

|                        |          |          |           |          |          |          |      |     |      |    |      |    |      |     |
|------------------------|----------|----------|-----------|----------|----------|----------|------|-----|------|----|------|----|------|-----|
| 081003-RZ1-25          | 0.071729 | 0.000600 | 1.471936  | 0.038441 | 0.148799 | 0.003645 | 989  | 17  | 919  | 16 | 894  | 21 | 894  | 21  |
| 081003-RZ1-47          | 0.072405 | 0.000452 | 1.507617  | 0.023708 | 0.150994 | 0.002191 | 998  | 25  | 933  | 10 | 907  | 12 | 907  | 12  |
| 081003-RZ1-13          | 0.069603 | 0.000553 | 1.453953  | 0.032483 | 0.151382 | 0.003512 | 917  | 0   | 912  | 14 | 909  | 20 | 909  | 20  |
| 081003-RZ1-12          | 0.069617 | 0.000674 | 1.454648  | 0.044259 | 0.151455 | 0.004862 | 917  | 21  | 912  | 18 | 909  | 27 | 909  | 27  |
| 081003-RZ1-14          | 0.069429 | 0.000569 | 1.462952  | 0.040246 | 0.152719 | 0.004224 | 922  | 17  | 915  | 17 | 916  | 24 | 916  | 24  |
| 081003-RZ1-44          | 0.075039 | 0.000419 | 1.740633  | 0.031415 | 0.168203 | 0.002770 | 1069 | 11  | 1024 | 12 | 1002 | 15 | 1069 | 11  |
| 081003-RZ1-62          | 0.076002 | 0.000370 | 1.857255  | 0.029890 | 0.177181 | 0.002695 | 1094 | 10  | 1066 | 11 | 1052 | 15 | 1094 | 10  |
| 081003-RZ1-50          | 0.093099 | 0.000494 | 3.206788  | 0.063783 | 0.249751 | 0.004666 | 1500 | 11  | 1459 | 16 | 1437 | 24 | 1500 | 11  |
| 081003-RZ1-46          | 0.114928 | 0.000701 | 4.700830  | 0.084425 | 0.296561 | 0.004556 | 1880 | 11  | 1767 | 15 | 1674 | 23 | 1880 | 11  |
| 081003-RZ1-07          | 0.110179 | 0.000639 | 4.688291  | 0.110447 | 0.308411 | 0.007780 | 1802 | 10  | 1765 | 20 | 1733 | 38 | 1802 | 10  |
| 081003-RZ1-18          | 0.117979 | 0.001392 | 5.022498  | 0.117406 | 0.308614 | 0.005716 | 1926 | 19  | 1823 | 20 | 1734 | 28 | 1926 | 19  |
| 081003-RZ1-15          | 0.102817 | 0.000973 | 4.387290  | 0.108027 | 0.309285 | 0.007290 | 1676 | 17  | 1710 | 21 | 1737 | 36 | 1676 | 17  |
| 081003-RZ1-04          | 0.119159 | 0.000507 | 5.099771  | 0.107853 | 0.310275 | 0.006703 | 1944 | 5   | 1836 | 18 | 1742 | 33 | 1944 | 5   |
| 081003-RZ1-33          | 0.110128 | 0.000547 | 4.715134  | 0.122702 | 0.310433 | 0.007943 | 1811 | 11  | 1770 | 22 | 1743 | 39 | 1811 | 11  |
| 081003-RZ1-61          | 0.111630 | 0.000498 | 4.780295  | 0.097647 | 0.310505 | 0.006111 | 1828 | -7  | 1781 | 18 | 1743 | 30 | 1828 | -7  |
| 081003-RZ1-48          | 0.113619 | 0.000546 | 4.879996  | 0.096754 | 0.311434 | 0.005820 | 1858 | 8   | 1799 | 17 | 1748 | 29 | 1858 | 8   |
| 081003-RZ1-01          | 0.119497 | 0.000665 | 5.436577  | 0.106320 | 0.329866 | 0.006012 | 1950 | 11  | 1891 | 17 | 1838 | 29 | 1950 | 11  |
| 081003-RZ1-02          | 0.120246 | 0.000513 | 5.527313  | 0.102563 | 0.333360 | 0.006567 | 1961 | 8   | 1905 | 16 | 1855 | 32 | 1961 | 8   |
| 081003-RZ1-16          | 0.121282 | 0.001142 | 5.598228  | 0.135359 | 0.334654 | 0.007867 | 1976 | 17  | 1916 | 21 | 1861 | 38 | 1976 | 17  |
| 081003-RZ1-37          | 0.110883 | 0.000596 | 5.120296  | 0.101280 | 0.334865 | 0.006361 | 1814 | 9   | 1839 | 17 | 1862 | 31 | 1814 | 9   |
| 081003-RZ1-09          | 0.117107 | 0.000853 | 5.415327  | 0.198547 | 0.335104 | 0.012924 | 1922 | 12  | 1887 | 32 | 1863 | 62 | 1922 | 12  |
| 081003-RZ1-40          | 0.114965 | 0.000814 | 5.314522  | 0.127097 | 0.335113 | 0.006785 | 1880 | 12  | 1871 | 21 | 1863 | 33 | 1880 | 12  |
| 081003-RZ1-52          | 0.112644 | 0.000520 | 5.225386  | 0.139028 | 0.336369 | 0.008718 | 1842 | 24  | 1857 | 23 | 1869 | 42 | 1842 | 24  |
| 081003-RZ1-17          | 0.110658 | 0.001165 | 5.136618  | 0.141259 | 0.336563 | 0.008731 | 1810 | 16  | 1842 | 24 | 1870 | 42 | 1810 | 16  |
| 081003-RZ1-63          | 0.117142 | 0.000454 | 5.712199  | 0.117625 | 0.353523 | 0.007071 | 1913 | 9   | 1933 | 18 | 1951 | 34 | 1913 | 9   |
| 081003-RZ1-54          | 0.124541 | 0.000535 | 6.268878  | 0.120134 | 0.364973 | 0.006449 | 2033 | 7   | 2014 | 17 | 2006 | 31 | 2033 | 7   |
| 081003-RZ1-05          | 0.122652 | 0.000609 | 6.191264  | 0.126132 | 0.365933 | 0.007791 | 1995 | 8   | 2003 | 18 | 2010 | 37 | 1995 | 8   |
| 081003-RZ1-28          | 0.148197 | 0.000893 | 8.464502  | 0.241675 | 0.414077 | 0.011490 | 2325 | 10  | 2282 | 26 | 2234 | 53 | 2325 | 10  |
| 081003-RZ1-45          | 0.177515 | 0.001779 | 10.512282 | 0.184624 | 0.429530 | 0.006912 | 2631 | 17  | 2481 | 17 | 2304 | 31 | 2631 | 17  |
| 081003-RZ1-64          | 0.167789 | 0.000657 | 10.242931 | 0.205109 | 0.442590 | 0.008916 | 2535 | -92 | 2457 | 19 | 2362 | 40 | 2535 | -92 |
| 081003-RZ1-53          | 0.167954 | 0.000660 | 10.727491 | 0.208912 | 0.463150 | 0.008689 | 2539 | 7   | 2500 | 19 | 2453 | 38 | 2539 | 7   |
| 081003-RZ1-60          | 0.165810 | 0.000936 | 10.794901 | 0.218416 | 0.472121 | 0.008902 | 2517 | 12  | 2506 | 19 | 2493 | 39 | 2517 | 12  |
| <b>080602-RZ1(T3m)</b> |          |          |           |          |          |          |      |     |      |    |      |    |      |     |
| 080602-RZ1-68          | 0.050912 | 0.000391 | 0.244580  | 0.002986 | 0.034837 | 0.000423 | 235  | 17  | 222  | 2  | 221  | 3  | 221  | 3   |
| 080602-RZ1-09          | 0.050789 | 0.000421 | 0.245926  | 0.004460 | 0.035114 | 0.000604 | 232  | 8   | 223  | 4  | 222  | 4  | 222  | 4   |
| 080602-RZ1-16          | 0.051327 | 0.000297 | 0.286517  | 0.004911 | 0.040478 | 0.000663 | 254  | 17  | 256  | 4  | 256  | 4  | 256  | 4   |
| 080602-RZ1-63          | 0.052465 | 0.000720 | 0.313297  | 0.004911 | 0.043300 | 0.000522 | 306  | 33  | 277  | 4  | 273  | 3  | 273  | 3   |
| 080602-RZ1-37          | 0.053174 | 0.000480 | 0.321068  | 0.004905 | 0.043783 | 0.000573 | 345  | 22  | 283  | 4  | 276  | 4  | 276  | 4   |
| 080602-RZ1-61          | 0.051674 | 0.000463 | 0.332223  | 0.007308 | 0.046603 | 0.000971 | 333  | 22  | 291  | 6  | 294  | 6  | 294  | 6   |
| 080602-RZ1-22          | 0.054147 | 0.000853 | 0.360107  | 0.006951 | 0.048236 | 0.000649 | 376  | 33  | 312  | 5  | 304  | 4  | 304  | 4   |
| 080602-RZ1-31          | 0.055836 | 0.001509 | 0.514762  | 0.015878 | 0.066879 | 0.001226 | 456  | 47  | 422  | 11 | 417  | 7  | 417  | 7   |
| 080602-RZ1-36          | 0.057160 | 0.000473 | 0.558046  | 0.007982 | 0.070809 | 0.001022 | 498  | 8   | 450  | 5  | 441  | 6  | 441  | 6   |
| 080602-RZ1-69          | 0.055308 | 0.000315 | 0.543196  | 0.008260 | 0.071213 | 0.001047 | 433  | 11  | 441  | 6  | 443  | 6  | 443  | 6   |
| 080602-RZ1-39          | 0.055999 | 0.000427 | 0.553250  | 0.010203 | 0.071640 | 0.001286 | 454  | 3   | 447  | 7  | 446  | 8  | 446  | 8   |
| 080602-RZ1-54          | 0.055951 | 0.000400 | 0.554630  | 0.008757 | 0.071864 | 0.001179 | 450  | 3   | 448  | 6  | 447  | 7  | 447  | 7   |
| 080602-RZ1-41          | 0.055866 | 0.000339 | 0.561650  | 0.012057 | 0.072888 | 0.001528 | 456  | 11  | 453  | 8  | 454  | 9  | 454  | 9   |
| 080602-RZ1-03          | 0.059993 | 0.000517 | 0.748606  | 0.009209 | 0.090497 | 0.000932 | 611  | 17  | 567  | 5  | 558  | 6  | 558  | 6   |
| 080602-RZ1-49          | 0.059649 | 0.000429 | 0.790214  | 0.014158 | 0.096037 | 0.001763 | 591  | 11  | 591  | 8  | 591  | 10 | 591  | 10  |
| 080602-RZ1-12          | 0.061076 | 0.000307 | 0.862986  | 0.015510 | 0.102455 | 0.001797 | 643  | 25  | 632  | 9  | 629  | 11 | 629  | 11  |
| 080602-RZ1-51          | 0.061656 | 0.000347 | 0.906872  | 0.017258 | 0.106625 | 0.002141 | 661  | 11  | 655  | 9  | 653  | 13 | 653  | 13  |
| 080602-RZ1-17          | 0.062278 | 0.000334 | 0.934950  | 0.014787 | 0.108858 | 0.001637 | 683  | 11  | 670  | 8  | 666  | 10 | 666  | 10  |
| 080602-RZ1-55          | 0.064540 | 0.000362 | 1.088274  | 0.015367 | 0.122226 | 0.001712 | 761  | 14  | 748  | 8  | 743  | 10 | 743  | 10  |
| 080602-RZ1-23          | 0.064919 | 0.000299 | 1.124024  | 0.019002 | 0.125554 | 0.002070 | 772  | 11  | 765  | 9  | 762  | 12 | 762  | 12  |
| 080602-RZ1-70          | 0.066589 | 0.000400 | 1.274122  | 0.020569 | 0.138740 | 0.002130 | 833  | 13  | 834  | 9  | 838  | 12 | 838  | 12  |
| 080602-RZ1-38          | 0.066564 | 0.000388 | 1.286754  | 0.019976 | 0.140169 | 0.002125 | 833  | 11  | 840  | 9  | 846  | 12 | 846  | 12  |
| 080602-RZ1-42          | 0.066497 | 0.000339 | 1.287413  | 0.021365 | 0.140365 | 0.002327 | 822  | 11  | 840  | 10 | 847  | 13 | 847  | 13  |
| 080602-RZ1-66          | 0.066350 | 0.000482 | 1.315612  | 0.025163 | 0.143762 | 0.002641 | 817  | 31  | 853  | 11 | 866  | 15 | 866  | 15  |
| 080602-RZ1-56          | 0.071744 | 0.000391 | 1.558549  | 0.021797 | 0.157488 | 0.002386 | 989  | 11  | 954  | 9  | 943  | 13 | 943  | 13  |
| 080602-RZ1-46          | 0.071274 | 0.000351 | 1.634055  | 0.025393 | 0.166205 | 0.002644 | 965  | 11  | 983  | 10 | 991  | 15 | 991  | 15  |
| 080602-RZ1-45          | 0.072005 | 0.000370 | 1.690952  | 0.031125 | 0.170261 | 0.003229 | 987  | 11  | 1005 | 12 | 1014 | 18 | 987  | 11  |
| 080602-RZ1-14          | 0.075601 | 0.000340 | 1.852804  | 0.030492 | 0.177716 | 0.002908 | 1084 | 6   | 1064 | 11 | 1054 | 16 | 1084 | 6   |
| 080602-RZ1-52          | 0.075009 | 0.000444 | 1.896775  | 0.032942 | 0.183318 | 0.003374 | 1133 | 11  | 1080 | 12 | 1085 | 18 | 1133 | 11  |
| 080602-RZ1-65          | 0.077768 | 0.000392 | 2.073569  | 0.026226 | 0.193318 | 0.002519 | 1143 | 8   | 1140 | 9  | 1139 | 14 | 1143 | 8   |
| 080602-RZ1-11          | 0.081051 | 0.000489 | 2.292907  | 0.038464 | 0.205159 | 0.003498 | 1233 | 11  | 1210 | 12 | 1203 | 19 | 1233 | 11  |
| 080602-RZ1-18          | 0.092663 | 0.000466 | 2.975512  | 0.102119 | 0.232798 | 0.007752 | 1481 | 7   | 1401 | 26 | 1349 | 41 | 1481 | 7   |
| 080602-RZ1-40          | 0.112395 | 0.000644 | 4.313175  | 0.100196 | 0.278191 | 0.006125 | 1839 | 19  | 1696 | 19 | 1582 | 31 | 1839 | 12  |
| 080602-RZ1-53          | 0.120567 | 0.001185 | 4.950703  | 0.120723 | 0.297460 | 0.005697 | 1965 | 20  | 1811 | 21 | 1679 | 28 | 1965 | 20  |
| 080602-RZ1-58          | 0.112364 | 0.000687 | 4.855579  | 0.078938 | 0.313254 | 0.005235 | 1839 | 11  | 1795 | 14 | 1757 | 26 | 1839 | 11  |
| 080602-RZ1-21          | 0.112920 | 0.000579 | 4.936168  | 0.105755 | 0.317003 | 0.006751 | 1847 | 9   | 1808 | 18 | 1775 | 33 | 1847 | 9   |
| 080602-RZ1-19          | 0.115473 | 0.000578 | 5.051019  | 0.092306 | 0.317200 | 0.005762 | 1887 | 24  | 1828 | 16 | 1776 | 28 | 1887 | 24  |
| 080602-RZ1-05          | 0.112566 | 0.000447 | 4.928804  | 0.093180 | 0.317543 | 0.006099 | 1843 | 7   | 1807 | 16 | 1778 | 30 | 1843 | 7   |
| 080602-RZ1-60          | 0.105468 | 0.000766 | 4.687121  | 0.088918 | 0.322189 | 0.006426 | 1724 | 14  | 1765 | 16 | 1800 | 31 | 1724 | 14  |
| 080602-RZ1-13          | 0.115369 | 0.000471 | 5.261762  | 0.081246 | 0.330716 | 0.005060 | 1887 | 7   | 1863 | 14 | 1842 | 25 | 1887 | 7   |
| 080602-RZ1-64          | 0.121035 | 0.000644 | 5.535393  | 0.089585 | 0.331526 | 0.005098 | 1972 | 12  | 1906 | 14 | 1846 | 25 | 1972 | 12  |
| 080602-RZ1-20          | 0.115433 | 0.000665 | 5.284423  | 0.121304 | 0.331958 | 0.007464 | 1887 | 25  | 1866 | 20 | 1848 | 36 | 1887 | 25  |
| 080602-RZ1-01          | 0.114147 | 0.000550 | 5.233407  | 0.077263 | 0.332489 | 0.004739 | 1866 | 7   | 1858 | 13 | 1850 | 23 | 1866 | 7   |
| 080602-RZ1-15          | 0.114019 | 0.000470 | 5.238893  | 0.097768 | 0.333193 | 0.006259 | 1865 | 107 | 1    |    |      |    |      |     |

|                        |          |          |           |          |          |          |      |      |      |    |      |    |      |     |
|------------------------|----------|----------|-----------|----------|----------|----------|------|------|------|----|------|----|------|-----|
| 080602-RZ1-59          | 0.166253 | 0.001099 | 11.125192 | 0.195095 | 0.485113 | 0.008862 | 2520 | 11   | 2534 | 17 | 2549 | 39 | 2520 | 11  |
| 080602-RZ1-44          | 0.163742 | 0.000780 | 11.090424 | 0.205010 | 0.490992 | 0.008851 | 2495 | 7    | 2531 | 18 | 2575 | 38 | 2495 | 7   |
| 080602-RZ1-48          | 0.165997 | 0.000863 | 11.372177 | 0.194351 | 0.496684 | 0.009206 | 2518 | 9    | 2554 | 17 | 2600 | 40 | 2518 | 9   |
| <b>080406-RZ1(T3m)</b> |          |          |           |          |          |          |      |      |      |    |      |    |      |     |
| 080406-RZ1-61          | 0.051801 | 0.000400 | 0.264984  | 0.006763 | 0.037099 | 0.000995 | 276  | -75  | 239  | 5  | 235  | 6  | 235  | 6   |
| 080406-RZ1-27          | 0.048853 | 0.000334 | 0.255369  | 0.005811 | 0.037898 | 0.000879 | 139  | -81  | 231  | 5  | 240  | 5  | 240  | 5   |
| 080406-RZ1-30          | 0.053879 | 0.000964 | 0.323258  | 0.011121 | 0.043471 | 0.001185 | 365  | 53   | 284  | 9  | 274  | 7  | 274  | 7   |
| 080406-RZ1-36          | 0.048960 | 0.000403 | 0.305538  | 0.006900 | 0.045259 | 0.001041 | 146  | 22   | 271  | 5  | 285  | 6  | 285  | 6   |
| 080406-RZ1-26          | 0.052263 | 0.000730 | 0.342094  | 0.006876 | 0.047513 | 0.001166 | 298  | 33   | 299  | 5  | 299  | 7  | 299  | 7   |
| 080406-RZ1-40          | 0.049878 | 0.000334 | 0.332214  | 0.010870 | 0.048281 | 0.001512 | 191  | 17   | 291  | 8  | 304  | 9  | 304  | 9   |
| 080406-RZ1-39          | 0.049330 | 0.000319 | 0.346518  | 0.007784 | 0.050928 | 0.001101 | 165  | 3    | 302  | 6  | 320  | 7  | 320  | 7   |
| 080406-RZ1-42          | 0.052743 | 0.000296 | 0.427313  | 0.009261 | 0.058738 | 0.001251 | 317  | -3   | 361  | 7  | 368  | 8  | 368  | 8   |
| 080406-RZ1-48          | 0.064007 | 0.000477 | 0.522006  | 0.008401 | 0.059128 | 0.000950 | 743  | 3    | 426  | 6  | 370  | 6  | 370  | 6   |
| 080406-RZ1-46          | 0.054020 | 0.000335 | 0.508449  | 0.009469 | 0.068243 | 0.001293 | 372  | 11   | 417  | 6  | 426  | 8  | 426  | 8   |
| 080406-RZ1-29          | 0.053462 | 0.000293 | 0.526871  | 0.015279 | 0.071453 | 0.002108 | 350  | 17   | 430  | 10 | 445  | 13 | 445  | 13  |
| 080406-RZ1-44          | 0.054280 | 0.000295 | 0.565657  | 0.015693 | 0.075568 | 0.002159 | 383  | -3   | 455  | 10 | 470  | 13 | 470  | 13  |
| 080406-RZ1-51          | 0.057568 | 0.000476 | 0.610285  | 0.008564 | 0.076878 | 0.001214 | 522  | 22   | 484  | 5  | 477  | 7  | 477  | 7   |
| 080406-RZ1-49          | 0.057377 | 0.000426 | 0.685067  | 0.012848 | 0.086579 | 0.001735 | 506  | 31   | 530  | 8  | 535  | 10 | 535  | 10  |
| 080406-RZ1-12          | 0.066053 | 0.000615 | 0.998545  | 0.019189 | 0.109644 | 0.002149 | 809  | -578 | 703  | 10 | 671  | 13 | 671  | 13  |
| 080406-RZ1-62          | 0.065300 | 0.000505 | 1.095911  | 0.023041 | 0.121703 | 0.002640 | 783  | 3    | 751  | 11 | 740  | 15 | 740  | 15  |
| 080406-RZ1-21          | 0.063018 | 0.000478 | 1.096961  | 0.027850 | 0.126189 | 0.003152 | 709  | 28   | 752  | 14 | 766  | 18 | 766  | 18  |
| 080406-RZ1-63          | 0.068891 | 0.000292 | 1.223499  | 0.023557 | 0.128780 | 0.002626 | 894  | 9    | 811  | 11 | 781  | 15 | 781  | 15  |
| 080406-RZ1-18          | 0.065967 | 0.000355 | 1.196791  | 0.033444 | 0.131537 | 0.003679 | 806  | -586 | 799  | 16 | 797  | 21 | 797  | 21  |
| 080406-RZ1-34          | 0.063195 | 0.000404 | 1.149936  | 0.023275 | 0.131942 | 0.002646 | 715  | 17   | 777  | 11 | 799  | 15 | 799  | 15  |
| 080406-RZ1-64          | 0.069673 | 0.000361 | 1.437094  | 0.029681 | 0.149542 | 0.003048 | 920  | 11   | 905  | 13 | 898  | 17 | 898  | 17  |
| 080406-RZ1-41          | 0.066550 | 0.000343 | 1.397047  | 0.028231 | 0.152203 | 0.003073 | 833  | 11   | 888  | 12 | 913  | 17 | 913  | 17  |
| 080406-RZ1-14          | 0.071664 | 0.000318 | 1.505644  | 0.047607 | 0.152314 | 0.004738 | 976  | 24   | 933  | 19 | 914  | 27 | 914  | 27  |
| 080406-RZ1-54          | 0.070440 | 0.000309 | 1.523384  | 0.028559 | 0.156800 | 0.003046 | 943  | 8    | 940  | 12 | 939  | 17 | 939  | 17  |
| 080406-RZ1-16          | 0.074953 | 0.000348 | 1.871620  | 0.050426 | 0.181031 | 0.004804 | 1133 | 8    | 1071 | 18 | 1073 | 26 | 1133 | 8   |
| 080406-RZ1-28          | 0.072820 | 0.000373 | 1.823730  | 0.045433 | 0.181573 | 0.004647 | 1009 | 11   | 1054 | 16 | 1076 | 25 | 1009 | 11  |
| 080406-RZ1-55          | 0.082178 | 0.000517 | 2.095399  | 0.075788 | 0.184681 | 0.005982 | 1250 | -3   | 1147 | 25 | 1092 | 33 | 1250 | -3  |
| 080406-RZ1-52          | 0.075695 | 0.000365 | 1.936568  | 0.041379 | 0.185477 | 0.004028 | 1087 | 25   | 1094 | 14 | 1097 | 22 | 1087 | 25  |
| 080406-RZ1-20          | 0.082973 | 0.000633 | 2.487683  | 0.068204 | 0.217441 | 0.006204 | 1278 | 13   | 1268 | 20 | 1268 | 33 | 1278 | 13  |
| 080406-RZ1-22          | 0.088531 | 0.000461 | 3.095397  | 0.094504 | 0.253387 | 0.007465 | 1394 | 11   | 1432 | 24 | 1456 | 38 | 1394 | 11  |
| 080406-RZ1-33          | 0.112807 | 0.001934 | 4.449375  | 0.207645 | 0.285176 | 0.009733 | 1856 | 30   | 1722 | 39 | 1617 | 49 | 1856 | 30  |
| 080406-RZ1-43          | 0.094758 | 0.000462 | 3.768032  | 0.080368 | 0.288307 | 0.006193 | 1524 | 11   | 1586 | 17 | 1633 | 31 | 1524 | 11  |
| 080406-RZ1-04          | 0.103486 | 0.000410 | 4.221731  | 0.108696 | 0.295864 | 0.007897 | 1687 | 23   | 1678 | 21 | 1671 | 39 | 1687 | 23  |
| 080406-RZ1-56          | 0.112264 | 0.000476 | 4.835604  | 0.082696 | 0.312256 | 0.005294 | 1836 | 6    | 1791 | 15 | 1752 | 26 | 1836 | 6   |
| 080406-RZ1-01          | 0.119561 | 0.000688 | 5.152364  | 0.141586 | 0.312487 | 0.008461 | 1950 | 12   | 1845 | 24 | 1753 | 42 | 1950 | 12  |
| 080406-RZ1-32          | 0.110828 | 0.000529 | 4.854463  | 0.118288 | 0.317569 | 0.007630 | 1813 | 10   | 1794 | 21 | 1778 | 37 | 1813 | 10  |
| 080406-RZ1-07          | 0.118978 | 0.000834 | 5.454982  | 0.166810 | 0.332294 | 0.009334 | 1943 | 14   | 1894 | 27 | 1849 | 45 | 1943 | 14  |
| 080406-RZ1-47          | 0.118361 | 0.000544 | 5.459295  | 0.094945 | 0.334400 | 0.005991 | 1932 | 24   | 1894 | 15 | 1860 | 29 | 1932 | 24  |
| 080406-RZ1-09          | 0.112727 | 0.000670 | 5.220710  | 0.114903 | 0.335738 | 0.006841 | 1844 | 10   | 1856 | 19 | 1866 | 33 | 1844 | 10  |
| 080406-RZ1-58          | 0.115953 | 0.000501 | 5.382158  | 0.102038 | 0.336507 | 0.006497 | 1895 | 9    | 1882 | 17 | 1870 | 31 | 1895 | 9   |
| 080406-RZ1-13          | 0.115716 | 0.000603 | 5.393508  | 0.112165 | 0.337906 | 0.006693 | 1891 | 9    | 1884 | 18 | 1877 | 32 | 1891 | 9   |
| 080406-RZ1-06          | 0.117274 | 0.000698 | 5.469537  | 0.155540 | 0.338016 | 0.008715 | 1917 | -3   | 1896 | 25 | 1877 | 42 | 1917 | -3  |
| 080406-RZ1-50          | 0.115139 | 0.000634 | 5.371278  | 0.117465 | 0.338226 | 0.007708 | 1883 | 11   | 1880 | 19 | 1878 | 37 | 1883 | 11  |
| 080406-RZ1-03          | 0.113783 | 0.000417 | 5.319763  | 0.147886 | 0.338979 | 0.009253 | 1861 | 6    | 1872 | 24 | 1882 | 45 | 1861 | 6   |
| 080406-RZ1-08          | 0.113413 | 0.000627 | 5.306993  | 0.138902 | 0.339251 | 0.008563 | 1855 | 10   | 1870 | 23 | 1883 | 41 | 1855 | 10  |
| 080406-RZ1-05          | 0.114232 | 0.000439 | 5.353396  | 0.136096 | 0.339838 | 0.008745 | 1933 | 6    | 1877 | 22 | 1886 | 42 | 1933 | 6   |
| 080406-RZ1-37          | 0.116744 | 0.000529 | 5.472752  | 0.117506 | 0.339931 | 0.007524 | 1907 | 6    | 1896 | 19 | 1886 | 36 | 1907 | 6   |
| 080406-RZ1-19          | 0.114029 | 0.000623 | 5.368486  | 0.162280 | 0.341341 | 0.010321 | 1865 | 108  | 1880 | 26 | 1893 | 50 | 1865 | 108 |
| 080406-RZ1-31          | 0.119197 | 0.000816 | 5.613748  | 0.137215 | 0.341618 | 0.008948 | 1944 | 14   | 1918 | 21 | 1894 | 43 | 1944 | 14  |
| 080406-RZ1-10          | 0.115189 | 0.000598 | 5.428185  | 0.153454 | 0.341644 | 0.009436 | 1883 | 11   | 1889 | 25 | 1895 | 45 | 1883 | 11  |
| 080406-RZ1-25          | 0.110554 | 0.000481 | 5.225608  | 0.159734 | 0.342594 | 0.010381 | 1809 | 11   | 1857 | 26 | 1899 | 50 | 1809 | 11  |
| 080406-RZ1-23          | 0.146091 | 0.001254 | 7.542466  | 0.145890 | 0.374214 | 0.006575 | 2302 | 15   | 2178 | 18 | 2049 | 31 | 2302 | 15  |
| 080406-RZ1-17          | 0.124511 | 0.000681 | 6.537924  | 0.162935 | 0.380828 | 0.010038 | 2022 | 7    | 2051 | 22 | 2080 | 47 | 2022 | 7   |
| 080406-RZ1-65          | 0.161631 | 0.000629 | 9.841676  | 0.173152 | 0.441482 | 0.007933 | 2473 | 6    | 2420 | 17 | 2357 | 36 | 2473 | 6   |
| 080406-RZ1-59          | 0.163520 | 0.000853 | 10.057644 | 0.153297 | 0.445924 | 0.007112 | 2492 | -7   | 2440 | 15 | 2377 | 32 | 2492 | -7  |
| 080406-RZ1-45          | 0.162591 | 0.000709 | 10.028000 | 0.238117 | 0.447125 | 0.010548 | 2483 | 10   | 2437 | 22 | 2382 | 47 | 2483 | 10  |
| 080406-RZ1-35          | 0.144151 | 0.000658 | 9.309335  | 0.188577 | 0.468220 | 0.009308 | 2277 | 7    | 2369 | 19 | 2476 | 41 | 2277 | 7   |
| 080406-RZ1-57          | 0.169460 | 0.000688 | 10.962332 | 0.174102 | 0.468995 | 0.007719 | 2554 | 6    | 2520 | 16 | 2479 | 34 | 2554 | 6   |
| 080406-RZ1-60          | 0.161022 | 0.000808 | 10.444634 | 0.209895 | 0.470227 | 0.009567 | 2466 | 7    | 2475 | 19 | 2485 | 42 | 2466 | 7   |
| 080406-RZ1-11          | 0.185788 | 0.000941 | 12.232515 | 0.320787 | 0.477319 | 0.012106 | 2705 | 11   | 2622 | 25 | 2516 | 53 | 2705 | 11  |
| 080406-RZ1-15          | 0.166439 | 0.000716 | 11.071105 | 0.281708 | 0.482267 | 0.012195 | 2522 | 7    | 2529 | 24 | 2537 | 53 | 2522 | 7   |
| 080406-RZ1-24          | 0.165107 | 0.000750 | 10.999764 | 0.313319 | 0.482886 | 0.013663 | 2509 | 25   | 2523 | 27 | 2540 | 60 | 2509 | 25  |
| 080406-RZ1-02          | 0.165604 | 0.000606 | 11.292625 | 0.345161 | 0.494374 | 0.014740 | 2514 | -8   | 2548 | 29 | 2590 | 64 | 2514 | -8  |
| 080406-RZ1-53          | 0.218516 | 0.001603 | 15.144845 | 0.383735 | 0.502099 | 0.010421 | 2970 | 12   | 2824 | 25 | 2623 | 45 | 2970 | 12  |
| 080406-RZ1-38          | 0.172779 | 0.000977 | 12.264547 | 0.329362 | 0.514978 | 0.015133 | 2585 | 7    | 2625 | 26 | 2678 | 65 | 2585 | 7   |
| <b>081302-RZ2(K1s)</b> |          |          |           |          |          |          |      |      |      |    |      |    |      |     |
| 081302-RZ2-49          | 0.048284 | 0.001969 | 0.169434  | 0.006976 | 0.025376 | 0.000289 | 122  | 96   | 159  | 6  | 162  | 2  | 162  | 2   |
| 081302-RZ2-51          | 0.051712 | 0.001688 | 0.238920  | 0.007796 | 0.033388 | 0.000326 | 272  | 76   | 218  | 6  | 212  | 2  | 212  | 2   |
| 081302-RZ2-17          | 0.054077 | 0.002947 | 0.255729  | 0.013828 | 0.034196 | 0.000489 | 376  | 122  | 231  | 11 | 217  | 3  | 217  | 3   |
| 081302-RZ2-06          | 0.047144 | 0.002909 | 0.235562  | 0.014174 | 0.035988 | 0.000621 | 58   | 141  | 215  | 12 | 218  | 4  | 228  | 4   |
| 081302-RZ2-32          | 0.048499 | 0.002075 | 0.255379  | 0.010693 | 0.038225 | 0.000422 | 124  | 100  | 231  | 9  | 242  | 3  | 242  | 3   |
| 081302-RZ2-52          | 0.053602 | 0.002325 | 0.284861  | 0.011713 | 0.038760 | 0.000505 | 354  | 98   | 255  | 9  | 245  | 3  | 245  | 3   |
| 081302-RZ2-14          | 0.050123 | 0.002432 | 0.272949  | 0.013008 | 0.039489 | 0.000584 | 211  | 113  | 245  |    |      |    |      |     |

|                        |          |          |           |          |          |          |      |      |      |    |      |    |      |    |
|------------------------|----------|----------|-----------|----------|----------|----------|------|------|------|----|------|----|------|----|
| 081302-RZ2-05          | 0.067251 | 0.001878 | 1.547641  | 0.042771 | 0.166134 | 0.001842 | 856  | 57   | 950  | 17 | 991  | 10 | 991  | 10 |
| 081302-RZ2-37          | 0.073162 | 0.002253 | 1.748045  | 0.053548 | 0.172495 | 0.001792 | 1018 | 63   | 1026 | 20 | 1026 | 10 | 1018 | 63 |
| 081302-RZ2-09          | 0.073313 | 0.001688 | 1.773657  | 0.040904 | 0.174253 | 0.001551 | 1033 | 79   | 1036 | 15 | 1036 | 9  | 1033 | 79 |
| 081302-RZ2-28          | 0.074890 | 0.002467 | 1.810306  | 0.060031 | 0.175198 | 0.001805 | 1065 | 67   | 1049 | 22 | 1041 | 10 | 1065 | 67 |
| 081302-RZ2-07          | 0.074969 | 0.002160 | 1.948055  | 0.056083 | 0.187186 | 0.001986 | 1133 | 57   | 1098 | 19 | 1106 | 11 | 1133 | 57 |
| 081302-RZ2-08          | 0.097457 | 0.002375 | 3.812748  | 0.091537 | 0.282232 | 0.002833 | 1576 | 45   | 1595 | 19 | 1603 | 14 | 1576 | 45 |
| 081302-RZ2-34          | 0.107975 | 0.002311 | 4.789056  | 0.100627 | 0.320165 | 0.002395 | 1766 | 40   | 1783 | 18 | 1791 | 12 | 1766 | 40 |
| 081302-RZ2-44          | 0.109485 | 0.002481 | 4.636144  | 0.107124 | 0.305107 | 0.003261 | 1791 | 41   | 1756 | 19 | 1717 | 16 | 1791 | 41 |
| 081302-RZ2-39          | 0.109629 | 0.002362 | 5.117396  | 0.109151 | 0.336523 | 0.002801 | 1794 | 39   | 1839 | 18 | 1870 | 14 | 1794 | 39 |
| 081302-RZ2-45          | 0.109856 | 0.002357 | 4.906112  | 0.106236 | 0.321603 | 0.002612 | 1798 | 39   | 1803 | 18 | 1798 | 13 | 1798 | 39 |
| 081302-RZ2-04          | 0.111575 | 0.002295 | 5.278269  | 0.115444 | 0.340569 | 0.003391 | 1825 | 37   | 1865 | 19 | 1889 | 16 | 1825 | 37 |
| 081302-RZ2-13          | 0.113076 | 0.003530 | 4.658926  | 0.145407 | 0.296863 | 0.003107 | 1850 | 57   | 1760 | 26 | 1676 | 15 | 1850 | 57 |
| 081302-RZ2-43          | 0.113212 | 0.002679 | 4.686899  | 0.109321 | 0.297895 | 0.002593 | 1852 | 43   | 1765 | 20 | 1681 | 13 | 1852 | 43 |
| 081302-RZ2-12          | 0.113559 | 0.003415 | 5.460664  | 0.162731 | 0.347016 | 0.003922 | 1857 | 55   | 1894 | 26 | 1920 | 19 | 1857 | 55 |
| 081302-RZ2-50          | 0.113664 | 0.002877 | 5.002318  | 0.129200 | 0.317660 | 0.002935 | 1859 | 46   | 1820 | 22 | 1778 | 14 | 1859 | 46 |
| 081302-RZ2-31          | 0.113677 | 0.002390 | 4.900138  | 0.102146 | 0.311219 | 0.002695 | 1859 | 39   | 1802 | 18 | 1747 | 13 | 1859 | 39 |
| 081302-RZ2-53          | 0.114345 | 0.002474 | 4.546156  | 0.095963 | 0.286871 | 0.002219 | 1869 | 39   | 1739 | 18 | 1626 | 11 | 1869 | 39 |
| 081302-RZ2-46          | 0.114878 | 0.002616 | 5.309764  | 0.121260 | 0.333423 | 0.002991 | 1880 | 41   | 1870 | 20 | 1855 | 14 | 1880 | 41 |
| 081302-RZ2-16          | 0.114993 | 0.002684 | 5.365673  | 0.126642 | 0.336330 | 0.002985 | 1880 | 41   | 1879 | 20 | 1869 | 14 | 1880 | 41 |
| 081302-RZ2-55          | 0.115005 | 0.002587 | 4.681038  | 0.102789 | 0.293158 | 0.002342 | 1880 | 41   | 1764 | 18 | 1657 | 12 | 1880 | 41 |
| 081302-RZ2-60          | 0.115074 | 0.002157 | 5.249896  | 0.096422 | 0.328542 | 0.002575 | 1881 | 34   | 1861 | 16 | 1831 | 13 | 1881 | 34 |
| 081302-RZ2-30          | 0.115088 | 0.002400 | 4.987066  | 0.106536 | 0.312613 | 0.002705 | 1881 | 37   | 1817 | 18 | 1754 | 13 | 1881 | 37 |
| 081302-RZ2-59          | 0.114242 | 0.002076 | 4.368694  | 0.079050 | 0.275274 | 0.002086 | 1933 | 33   | 1706 | 15 | 1568 | 11 | 1933 | 33 |
| 081302-RZ2-10          | 0.123200 | 0.002925 | 5.723787  | 0.147847 | 0.333996 | 0.003860 | 2003 | 47   | 1935 | 22 | 1858 | 19 | 2003 | 47 |
| 081302-RZ2-58          | 0.139127 | 0.002760 | 6.844988  | 0.136266 | 0.354121 | 0.002758 | 2216 | 33   | 2092 | 18 | 1954 | 13 | 2216 | 33 |
| 081302-RZ2-23          | 0.157692 | 0.002911 | 9.961822  | 0.185008 | 0.456854 | 0.003496 | 2431 | 31   | 2431 | 17 | 2426 | 16 | 2431 | 31 |
| 081302-RZ2-21          | 0.158209 | 0.003588 | 8.901348  | 0.221333 | 0.405394 | 0.003543 | 2437 | 39   | 2328 | 23 | 2194 | 16 | 2437 | 39 |
| 081302-RZ2-38          | 0.160306 | 0.003827 | 10.305285 | 0.249734 | 0.463343 | 0.004397 | 2459 | 40   | 2463 | 22 | 2454 | 19 | 2459 | 40 |
| 081302-RZ2-26          | 0.267089 | 0.005034 | 20.080425 | 0.387399 | 0.544282 | 0.006307 | 3300 | 30   | 3095 | 19 | 2801 | 26 | 3300 | 30 |
| <b>081401-RZ1(K1d)</b> |          |          |           |          |          |          |      |      |      |    |      |    |      |    |
| 081401-RZ1-60          | 0.053193 | 0.002023 | 0.127379  | 0.004818 | 0.017292 | 0.000213 | 345  | 82   | 122  | 4  | 111  | 1  | 111  | 1  |
| 081401-RZ1-43          | 0.054510 | 0.004185 | 0.127214  | 0.008589 | 0.017347 | 0.000383 | 391  | 179  | 122  | 8  | 111  | 2  | 111  | 2  |
| 081401-RZ1-37          | 0.050830 | 0.002110 | 0.126375  | 0.005237 | 0.018037 | 0.000229 | 232  | 64   | 121  | 5  | 115  | 1  | 115  | 1  |
| 081401-RZ1-46          | 0.052239 | 0.003019 | 0.130725  | 0.007810 | 0.018122 | 0.000263 | 295  | 133  | 125  | 7  | 116  | 2  | 116  | 2  |
| 081401-RZ1-13          | 0.046393 | 0.003195 | 0.114880  | 0.007180 | 0.018221 | 0.000307 | 17   | 159  | 110  | 7  | 116  | 2  | 116  | 2  |
| 081401-RZ1-39          | 0.048603 | 0.005310 | 0.127529  | 0.015368 | 0.018489 | 0.000285 | 128  | 241  | 122  | 14 | 118  | 2  | 118  | 2  |
| 081401-RZ1-42          | 0.046355 | 0.001867 | 0.118801  | 0.004665 | 0.018589 | 0.000196 | 17   | 93   | 114  | 4  | 119  | 1  | 119  | 1  |
| 081401-RZ1-50          | 0.054097 | 0.003393 | 0.137420  | 0.008212 | 0.018592 | 0.000295 | 376  | 141  | 131  | 7  | 119  | 2  | 119  | 2  |
| 081401-RZ1-25          | 0.052221 | 0.002506 | 0.134588  | 0.006567 | 0.018616 | 0.000240 | 295  | 139  | 128  | 6  | 119  | 2  | 119  | 2  |
| 081401-RZ1-20          | 0.048494 | 0.002666 | 0.124155  | 0.006686 | 0.018621 | 0.000234 | 124  | 131  | 119  | 6  | 119  | 1  | 119  | 1  |
| 081401-RZ1-32          | 0.050183 | 0.002382 | 0.129086  | 0.006234 | 0.018627 | 0.000252 | 211  | 105  | 123  | 6  | 119  | 2  | 119  | 2  |
| 081401-RZ1-10          | 0.049885 | 0.002246 | 0.128108  | 0.006098 | 0.018761 | 0.000236 | 191  | 110  | 122  | 5  | 120  | 1  | 120  | 1  |
| 081401-RZ1-21          | 0.046510 | 0.002233 | 0.121108  | 0.005789 | 0.018802 | 0.000244 | 33   | 167  | 116  | 5  | 120  | 2  | 120  | 2  |
| 081401-RZ1-14          | 0.046486 | 0.001743 | 0.121384  | 0.004519 | 0.018842 | 0.000217 | 33   | 76   | 116  | 4  | 120  | 1  | 120  | 1  |
| 081401-RZ1-30          | 0.048573 | 0.004626 | 0.126949  | 0.011576 | 0.018868 | 0.000379 | 128  | 217  | 121  | 10 | 120  | 2  | 120  | 2  |
| 081401-RZ1-05          | 0.049843 | 0.003047 | 0.131128  | 0.009305 | 0.018971 | 0.000323 | 187  | 143  | 125  | 8  | 121  | 2  | 121  | 2  |
| 081401-RZ1-22          | 0.046061 | 0.001991 | 0.120867  | 0.005087 | 0.019029 | 0.000226 | 400  | -298 | 116  | 5  | 122  | 1  | 122  | 1  |
| 081401-RZ1-15          | 0.047070 | 0.002162 | 0.124023  | 0.005504 | 0.019059 | 0.000237 | 54   | 113  | 119  | 5  | 122  | 2  | 122  | 2  |
| 081401-RZ1-12          | 0.049759 | 0.003272 | 0.130826  | 0.008349 | 0.019182 | 0.000269 | 183  | 149  | 125  | 7  | 122  | 2  | 122  | 2  |
| 081401-RZ1-29          | 0.051473 | 0.002017 | 0.136601  | 0.005311 | 0.019190 | 0.000192 | 261  | 91   | 130  | 5  | 123  | 1  | 123  | 1  |
| 081401-RZ1-18          | 0.046621 | 0.003020 | 0.123789  | 0.007618 | 0.019237 | 0.000251 | 32   | 157  | 119  | 7  | 123  | 2  | 123  | 2  |
| 081401-RZ1-03          | 0.046778 | 0.001792 | 0.124256  | 0.004731 | 0.019276 | 0.000207 | 39   | 89   | 119  | 4  | 123  | 1  | 123  | 1  |
| 081401-RZ1-28          | 0.050657 | 0.002585 | 0.134800  | 0.006812 | 0.019303 | 0.000241 | 233  | 119  | 128  | 6  | 123  | 2  | 123  | 2  |
| 081401-RZ1-11          | 0.047112 | 0.003752 | 0.122895  | 0.009454 | 0.019308 | 0.000342 | 54   | 181  | 118  | 9  | 123  | 2  | 123  | 2  |
| 081401-RZ1-34          | 0.051468 | 0.003948 | 0.135168  | 0.009905 | 0.019383 | 0.000382 | 261  | 176  | 129  | 9  | 124  | 2  | 124  | 2  |
| 081401-RZ1-07          | 0.046513 | 0.002666 | 0.123176  | 0.006888 | 0.019460 | 0.000266 | 33   | 133  | 118  | 6  | 124  | 2  | 124  | 2  |
| 081401-RZ1-16          | 0.046838 | 0.003195 | 0.126001  | 0.008416 | 0.019525 | 0.000316 | 43   | 156  | 120  | 8  | 125  | 2  | 125  | 2  |
| 081401-RZ1-49          | 0.047939 | 0.002670 | 0.129689  | 0.007357 | 0.019685 | 0.000299 | 95   | 139  | 124  | 7  | 126  | 2  | 126  | 2  |
| 081401-RZ1-24          | 0.052123 | 0.002552 | 0.140616  | 0.006376 | 0.019710 | 0.000228 | 300  | 111  | 134  | 6  | 126  | 1  | 126  | 1  |
| 081401-RZ1-01          | 0.050887 | 0.002419 | 0.138962  | 0.006528 | 0.019794 | 0.000239 | 235  | 111  | 132  | 6  | 126  | 2  | 126  | 2  |
| 081401-RZ1-06          | 0.047520 | 0.003148 | 0.132453  | 0.008728 | 0.020379 | 0.000410 | 76   | 157  | 126  | 8  | 130  | 3  | 130  | 3  |
| 081401-RZ1-08          | 0.046830 | 0.002282 | 0.132275  | 0.006772 | 0.020607 | 0.000270 | 39   | 115  | 126  | 6  | 131  | 2  | 131  | 2  |
| 081401-RZ1-51          | 0.054185 | 0.003013 | 0.153716  | 0.007666 | 0.020757 | 0.000333 | 389  | 121  | 145  | 7  | 132  | 2  | 132  | 2  |
| 081401-RZ1-48          | 0.049817 | 0.002568 | 0.143365  | 0.007486 | 0.020774 | 0.000248 | 187  | 120  | 136  | 7  | 133  | 2  | 133  | 2  |
| 081401-RZ1-02          | 0.047542 | 0.002102 | 0.138477  | 0.006095 | 0.021291 | 0.000318 | 76   | 113  | 132  | 5  | 136  | 2  | 136  | 2  |
| 081401-RZ1-41          | 0.050643 | 0.002694 | 0.151332  | 0.008178 | 0.021543 | 0.000284 | 233  | 122  | 143  | 7  | 137  | 2  | 137  | 2  |
| 081401-RZ1-04          | 0.046272 | 0.002727 | 0.149754  | 0.008809 | 0.022630 | 0.000319 | 13   | 133  | 142  | 8  | 151  | 2  | 151  | 2  |
| 081401-RZ1-57          | 0.050776 | 0.001706 | 0.228678  | 0.007542 | 0.032659 | 0.000326 | 232  | 78   | 209  | 6  | 207  | 2  | 207  | 2  |
| 081401-RZ1-59          | 0.071470 | 0.011052 | 0.763700  | 0.075793 | 0.084707 | 0.004888 | 972  | 319  | 576  | 44 | 524  | 29 | 524  | 29 |
| 081401-RZ1-09          | 0.064096 | 0.002123 | 0.839684  | 0.033976 | 0.094682 | 0.001801 | 746  | 70   | 619  | 19 | 583  | 11 | 583  | 11 |
| 081401-RZ1-33          | 0.061316 | 0.001872 | 0.836578  | 0.026044 | 0.098393 | 0.000987 | 650  | 66   | 617  | 14 | 605  | 6  | 605  | 6  |
| 081401-RZ1-54          | 0.059531 | 0.003866 | 0.920935  | 0.057917 | 0.112970 | 0.001587 | 587  | 141  | 663  | 31 | 690  | 9  | 690  | 9  |
| 081401-RZ1-17          | 0.069685 | 0.002028 | 1.714227  | 0.047658 | 0.176538 | 0.001610 | 920  | 66   | 1014 | 18 | 1048 | 9  | 920  | 66 |
| 081401-RZ1-47          | 0.072011 | 0.001520 | 1.534165  | 0.033409 | 0.153777 | 0.001282 | 987  | 43   | 944  | 13 | 922  | 7  | 922  | 7  |
| 081401-RZ1-55          | 0.079629 | 0.002605 | 1.745094  | 0.056608 | 0.158864 | 0.001587 | 1188 | 65   | 1025 | 21 | 950  | 9  | 950  | 9  |
| 081401-RZ1-23          | 0.073668 | 0.001819 | 1.781199  | 0.043527 | 0.174381 | 0.001596 | 1032 | 50   | 1039 | 16 | 1036 | 9  | 1032 | 50 |
| 081401-RZ1-35          | 0.076724 | 0.002202 | 1.872347  | 0.054274 | 0.175743 | 0.001757 | 1114 | 56   | 1071 | 19 | 1044 | 10 | 1114 | 56 |
| 081401-RZ1-26          | 0.077    |          |           |          |          |          |      |      |      |    |      |    |      |    |

|                |          |          |          |          |          |          |      |      |      |    |      |    |      |    |
|----------------|----------|----------|----------|----------|----------|----------|------|------|------|----|------|----|------|----|
| 081802-RZ1-52  | 0.048760 | 0.001310 | 0.246680 | 0.006836 | 0.036583 | 0.000353 | 200  | 63   | 224  | 6  | 232  | 2  | 232  | 2  |
| 081802-RZ1-64  | 0.053332 | 0.001035 | 0.310436 | 0.006075 | 0.042126 | 0.000277 | 343  | 44   | 275  | 5  | 266  | 2  | 266  | 2  |
| 081802-RZ1-47  | 0.056712 | 0.002078 | 0.421697 | 0.014566 | 0.054185 | 0.000544 | 480  | 81   | 357  | 10 | 340  | 3  | 340  | 3  |
| 081802-RZ1-41  | 0.057622 | 0.003032 | 0.475171 | 0.024371 | 0.060109 | 0.000785 | 517  | 117  | 395  | 17 | 376  | 5  | 376  | 5  |
| 081802-RZ1-78  | 0.056720 | 0.001229 | 0.542071 | 0.011544 | 0.069458 | 0.000642 | 480  | 48   | 440  | 8  | 433  | 4  | 433  | 4  |
| 081802-RZ1-58  | 0.058440 | 0.002233 | 0.562440 | 0.021111 | 0.069652 | 0.000790 | 546  | 83   | 453  | 14 | 434  | 5  | 434  | 5  |
| 081802-RZ1-31  | 0.061182 | 0.002868 | 0.683880 | 0.032103 | 0.080644 | 0.000975 | 656  | 100  | 529  | 19 | 500  | 6  | 500  | 6  |
| 081802-RZ1-19  | 0.053816 | 0.002202 | 0.601664 | 0.024395 | 0.080985 | 0.000848 | 365  | 60   | 478  | 15 | 502  | 5  | 502  | 5  |
| 081802-RZ1-55  | 0.055771 | 0.003165 | 0.620199 | 0.033773 | 0.081356 | 0.001405 | 443  | 121  | 490  | 21 | 504  | 8  | 504  | 8  |
| 081802-RZ1-12  | 0.053841 | 0.001982 | 0.614968 | 0.022009 | 0.082500 | 0.001003 | 365  | 88   | 487  | 14 | 511  | 6  | 511  | 6  |
| 081802-RZ1-39  | 0.060839 | 0.002650 | 0.699065 | 0.030142 | 0.083655 | 0.000945 | 635  | 62   | 538  | 18 | 518  | 6  | 518  | 6  |
| 081802-RZ1-24  | 0.055412 | 0.001785 | 0.649852 | 0.020655 | 0.085010 | 0.000916 | 428  | 72   | 508  | 13 | 526  | 5  | 526  | 5  |
| 081802-RZ1-122 | 0.056709 | 0.000866 | 0.669127 | 0.011086 | 0.085344 | 0.000624 | 480  | 33   | 520  | 7  | 528  | 4  | 528  | 4  |
| 081802-RZ1-111 | 0.056600 | 0.001399 | 0.670806 | 0.016533 | 0.086148 | 0.000832 | 476  | 56   | 521  | 10 | 533  | 5  | 533  | 5  |
| 081802-RZ1-117 | 0.056470 | 0.000877 | 0.674821 | 0.010964 | 0.086508 | 0.000659 | 472  | 35   | 524  | 7  | 535  | 4  | 535  | 4  |
| 081802-RZ1-69  | 0.056397 | 0.001076 | 0.678446 | 0.014213 | 0.086992 | 0.000893 | 478  | 38   | 526  | 9  | 538  | 5  | 538  | 5  |
| 081802-RZ1-73  | 0.058331 | 0.001136 | 0.711587 | 0.014160 | 0.088492 | 0.000823 | 543  | 43   | 546  | 8  | 547  | 5  | 547  | 5  |
| 081802-RZ1-91  | 0.060116 | 0.001504 | 0.739470 | 0.019168 | 0.089014 | 0.000869 | 609  | 54   | 562  | 11 | 550  | 5  | 550  | 5  |
| 081802-RZ1-113 | 0.057509 | 0.001067 | 0.707479 | 0.013299 | 0.089167 | 0.000805 | 509  | 36   | 543  | 8  | 551  | 5  | 551  | 5  |
| 081802-RZ1-20  | 0.059096 | 0.001791 | 0.747980 | 0.022372 | 0.091674 | 0.000901 | 572  | 67   | 567  | 13 | 565  | 5  | 565  | 5  |
| 081802-RZ1-102 | 0.055752 | 0.000799 | 0.719057 | 0.011062 | 0.093389 | 0.000675 | 443  | 31   | 550  | 7  | 576  | 4  | 576  | 4  |
| 081802-RZ1-71  | 0.065069 | 0.001341 | 0.843304 | 0.017820 | 0.093701 | 0.000601 | 776  | 44   | 621  | 10 | 577  | 4  | 577  | 4  |
| 081802-RZ1-105 | 0.057156 | 0.000861 | 0.745114 | 0.011439 | 0.094436 | 0.000747 | 498  | 33   | 565  | 7  | 582  | 4  | 582  | 4  |
| 081802-RZ1-109 | 0.057010 | 0.001705 | 0.747628 | 0.022015 | 0.095161 | 0.000915 | 500  | 67   | 567  | 13 | 586  | 5  | 586  | 5  |
| 081802-RZ1-70  | 0.059364 | 0.001274 | 0.792657 | 0.017290 | 0.096663 | 0.000796 | 589  | 48   | 593  | 10 | 595  | 5  | 595  | 5  |
| 081802-RZ1-106 | 0.056901 | 0.000929 | 0.765193 | 0.013077 | 0.097233 | 0.000743 | 487  | 37   | 577  | 8  | 598  | 4  | 598  | 4  |
| 081802-RZ1-123 | 0.057605 | 0.002306 | 0.794868 | 0.031262 | 0.100239 | 0.001169 | 522  | 89   | 594  | 18 | 616  | 7  | 616  | 7  |
| 081802-RZ1-99  | 0.058797 | 0.001036 | 0.826663 | 0.016261 | 0.101802 | 0.000946 | 561  | 39   | 612  | 9  | 625  | 6  | 625  | 6  |
| 081802-RZ1-30  | 0.064062 | 0.004251 | 1.033217 | 0.061705 | 0.119618 | 0.001825 | 743  | 141  | 721  | 31 | 728  | 11 | 728  | 11 |
| 081802-RZ1-56  | 0.067896 | 0.002443 | 1.185082 | 0.044635 | 0.125775 | 0.001527 | 865  | 74   | 794  | 21 | 764  | 9  | 764  | 9  |
| 081802-RZ1-65  | 0.066747 | 0.001151 | 1.264138 | 0.024140 | 0.136843 | 0.001206 | 831  | 35   | 830  | 11 | 827  | 7  | 827  | 7  |
| 081802-RZ1-88  | 0.067495 | 0.001612 | 1.325760 | 0.032793 | 0.142642 | 0.001444 | 854  | -149 | 857  | 14 | 860  | 8  | 860  | 8  |
| 081802-RZ1-84  | 0.071106 | 0.001161 | 1.426259 | 0.027138 | 0.144978 | 0.001203 | 961  | 33   | 900  | 11 | 873  | 7  | 873  | 7  |
| 081802-RZ1-15  | 0.064635 | 0.002238 | 1.315589 | 0.045643 | 0.147119 | 0.001484 | 761  | 74   | 853  | 20 | 885  | 8  | 885  | 8  |
| 081802-RZ1-59  | 0.067621 | 0.001950 | 1.375575 | 0.038942 | 0.147276 | 0.001548 | 857  | 60   | 879  | 17 | 886  | 9  | 886  | 9  |
| 081802-RZ1-100 | 0.064956 | 0.001153 | 1.337944 | 0.025440 | 0.149390 | 0.001413 | 772  | 32   | 862  | 11 | 898  | 8  | 898  | 8  |
| 081802-RZ1-83  | 0.073200 | 0.001146 | 1.517111 | 0.024694 | 0.150270 | 0.001028 | 1020 | 32   | 937  | 10 | 902  | 6  | 902  | 6  |
| 081802-RZ1-32  | 0.078697 | 0.003657 | 1.640540 | 0.076982 | 0.150547 | 0.002087 | 1165 | 92   | 986  | 30 | 904  | 12 | 904  | 12 |
| 081802-RZ1-124 | 0.069700 | 0.001151 | 1.471596 | 0.025061 | 0.152911 | 0.001185 | 920  | 33   | 919  | 10 | 917  | 7  | 917  | 7  |
| 081802-RZ1-33  | 0.073937 | 0.002036 | 1.574039 | 0.042454 | 0.153573 | 0.001354 | 1039 | 56   | 960  | 17 | 921  | 8  | 921  | 8  |
| 081802-RZ1-108 | 0.066871 | 0.001576 | 1.427409 | 0.034244 | 0.154495 | 0.001530 | 835  | 50   | 900  | 14 | 926  | 9  | 926  | 9  |
| 081802-RZ1-50  | 0.069834 | 0.001793 | 1.491450 | 0.037353 | 0.154878 | 0.001551 | 924  | 53   | 927  | 15 | 928  | 9  | 928  | 9  |
| 081802-RZ1-67  | 0.069875 | 0.001250 | 1.502824 | 0.028028 | 0.155484 | 0.001157 | 924  | 37   | 932  | 11 | 932  | 6  | 932  | 6  |
| 081802-RZ1-94  | 0.070261 | 0.001431 | 1.512678 | 0.029635 | 0.156348 | 0.001267 | 1000 | 42   | 936  | 12 | 936  | 7  | 936  | 7  |
| 081802-RZ1-11  | 0.070626 | 0.002538 | 1.891406 | 0.066234 | 0.194339 | 0.002279 | 946  | 73   | 1078 | 23 | 1145 | 12 | 946  | 73 |
| 081802-RZ1-54  | 0.070873 | 0.001756 | 1.561470 | 0.037910 | 0.159458 | 0.001341 | 954  | 51   | 955  | 15 | 954  | 7  | 954  | 7  |
| 081802-RZ1-75  | 0.071408 | 0.001140 | 1.575336 | 0.025603 | 0.159641 | 0.001113 | 969  | 6    | 961  | 10 | 955  | 6  | 955  | 6  |
| 081802-RZ1-95  | 0.069942 | 0.001285 | 1.546829 | 0.029306 | 0.160194 | 0.001416 | 928  | 38   | 949  | 12 | 958  | 8  | 958  | 8  |
| 081802-RZ1-02  | 0.071383 | 0.002203 | 1.718273 | 0.050977 | 0.173826 | 0.001530 | 969  | 63   | 1015 | 19 | 1033 | 8  | 969  | 63 |
| 081802-RZ1-27  | 0.074661 | 0.001781 | 1.702674 | 0.040535 | 0.164879 | 0.001479 | 1061 | 48   | 1010 | 15 | 984  | 8  | 984  | 8  |
| 081802-RZ1-07  | 0.072779 | 0.002868 | 1.909945 | 0.073978 | 0.189849 | 0.002345 | 1009 | 81   | 1085 | 26 | 1121 | 13 | 1009 | 81 |
| 081802-RZ1-03  | 0.073290 | 0.001872 | 1.826289 | 0.045970 | 0.179613 | 0.001660 | 1022 | 52   | 1055 | 17 | 1065 | 9  | 1022 | 52 |
| 081802-RZ1-68  | 0.073374 | 0.001121 | 1.786986 | 0.032674 | 0.175839 | 0.001855 | 1033 | 30   | 1041 | 12 | 1044 | 10 | 1033 | 30 |
| 081802-RZ1-107 | 0.073908 | 0.001160 | 1.908614 | 0.030431 | 0.186691 | 0.001375 | 1039 | 31   | 1084 | 11 | 1103 | 7  | 1039 | 31 |
| 081802-RZ1-22  | 0.074091 | 0.002821 | 1.968151 | 0.076739 | 0.192088 | 0.002076 | 1044 | 78   | 1105 | 26 | 1133 | 11 | 1044 | 78 |
| 081802-RZ1-79  | 0.074132 | 0.001132 | 1.909859 | 0.031839 | 0.186567 | 0.001636 | 1056 | 31   | 1085 | 11 | 1103 | 9  | 1056 | 31 |
| 081802-RZ1-115 | 0.074537 | 0.001008 | 1.938167 | 0.029041 | 0.188041 | 0.001464 | 1057 | 28   | 1094 | 10 | 1111 | 8  | 1057 | 28 |
| 081802-RZ1-97  | 0.074724 | 0.001000 | 1.837652 | 0.027592 | 0.177945 | 0.001396 | 1061 | 26   | 1059 | 10 | 1056 | 8  | 1061 | 26 |
| 081802-RZ1-76  | 0.074773 | 0.001221 | 1.774872 | 0.031777 | 0.171562 | 0.001515 | 1063 | 33   | 1036 | 12 | 1021 | 8  | 1063 | 33 |
| 081802-RZ1-110 | 0.075119 | 0.001264 | 1.980784 | 0.036580 | 0.190674 | 0.002006 | 1072 | 33   | 1109 | 12 | 1125 | 11 | 1072 | 33 |
| 081802-RZ1-06  | 0.075331 | 0.001746 | 2.046008 | 0.047101 | 0.195824 | 0.002022 | 1077 | 46   | 1131 | 16 | 1153 | 11 | 1077 | 46 |
| 081802-RZ1-16  | 0.075844 | 0.002193 | 2.022159 | 0.058733 | 0.192665 | 0.002159 | 1100 | 58   | 1123 | 20 | 1136 | 12 | 1100 | 58 |
| 081802-RZ1-104 | 0.076229 | 0.001082 | 2.207387 | 0.035496 | 0.209285 | 0.001670 | 1102 | 29   | 1183 | 11 | 1225 | 9  | 1102 | 29 |
| 081802-RZ1-120 | 0.076307 | 0.001296 | 2.057622 | 0.036956 | 0.195347 | 0.001695 | 1103 | 2    | 1135 | 12 | 1150 | 9  | 1103 | 2  |
| 081802-RZ1-116 | 0.076358 | 0.001026 | 1.981044 | 0.038668 | 0.187109 | 0.002547 | 1106 | 27   | 1109 | 13 | 1106 | 14 | 1106 | 27 |
| 081802-RZ1-46  | 0.076483 | 0.001839 | 1.851327 | 0.046527 | 0.174998 | 0.001549 | 1109 | 48   | 1064 | 17 | 1040 | 9  | 1109 | 48 |
| 081802-RZ1-118 | 0.076935 | 0.001404 | 2.132846 | 0.041085 | 0.200780 | 0.001767 | 1120 | 36   | 1160 | 13 | 1180 | 10 | 1120 | 36 |
| 081802-RZ1-61  | 0.077256 | 0.001513 | 2.016798 | 0.042709 | 0.188978 | 0.001916 | 1128 | 39   | 1121 | 14 | 1116 | 10 | 1128 | 39 |
| 081802-RZ1-36  | 0.078256 | 0.002023 | 2.008353 | 0.050755 | 0.185919 | 0.001812 | 1154 | 52   | 1118 | 17 | 1099 | 10 | 1154 | 52 |
| 081802-RZ1-98  | 0.078662 | 0.001240 | 2.145252 | 0.035009 | 0.197722 | 0.001565 | 1165 | 31   | 1164 | 11 | 1163 | 8  | 1165 | 31 |
| 081802-RZ1-114 | 0.078724 | 0.000953 | 1.990499 | 0.024306 | 0.182908 | 0.001072 | 1165 | 24   | 1112 | 8  | 1083 | 6  | 1165 | 24 |
| 081802-RZ1-77  | 0.078953 | 0.001875 | 2.191758 | 0.051673 | 0.201986 | 0.002227 | 1172 | 46   | 1178 | 16 | 1186 | 12 | 1172 | 46 |
| 081802-RZ1-62  | 0.079438 | 0.001388 | 2.226838 | 0.039913 | 0.203134 | 0.001765 | 1183 | 34   | 1190 | 13 | 1192 | 9  | 1183 | 34 |
| 081802-RZ1-43  | 0.079238 | 0.001896 | 2.077694 | 0.051440 | 0.189785 | 0.001601 | 1189 | 47   | 1141 | 17 | 1120 | 9  | 1189 | 47 |
| 081802-RZ1-23  | 0.080394 | 0.002017 | 2.548256 | 0.065991 | 0.229021 | 0.002280 | 1206 | 44   | 1286 | 19 | 1329 | 12 | 1206 | 44 |
| 081802-RZ1-40  | 0.080714 | 0.003124 | 2.162172 | 0.083718 | 0.195039 | 0.002330 | 1215 | 76   | 1169 | 27 | 1149 | 13 | 1215 | 76 |
| 081802-RZ1-87  | 0.080711 | 0.001201 | 2.145181 | 0.034248 | 0.192632 | 0.001535 | 1215 | 29   | 1163 | 11 | 1136 | 8  | 1215 | 29 |
| 081802-RZ1-72  |          |          |          |          |          |          |      |      |      |    |      |    |      |    |

|                        |          |          |           |          |          |          |      |      |      |    |      |    |      |     |
|------------------------|----------|----------|-----------|----------|----------|----------|------|------|------|----|------|----|------|-----|
| 081802-RZ1-48          | 0.177321 | 0.004042 | 10.008832 | 0.228566 | 0.408038 | 0.003328 | 2628 | 37   | 2436 | 21 | 2206 | 15 | 2628 | 37  |
| 081802-RZ1-112         | 0.178878 | 0.002757 | 12.831764 | 0.236404 | 0.516824 | 0.004469 | 2642 | 25   | 2667 | 17 | 2686 | 19 | 2642 | 25  |
| 081802-RZ1-93          | 0.180550 | 0.002474 | 11.695074 | 0.174773 | 0.468071 | 0.003771 | 2658 | 23   | 2580 | 14 | 2475 | 17 | 2658 | 23  |
| 081802-RZ1-38          | 0.181014 | 0.003695 | 10.391800 | 0.225215 | 0.414730 | 0.003812 | 2662 | 34   | 2470 | 20 | 2237 | 17 | 2662 | 34  |
| 081802-RZ1-92          | 0.184059 | 0.002546 | 10.797706 | 0.185409 | 0.424326 | 0.005171 | 2690 | -10  | 2506 | 16 | 2280 | 23 | 2690 | -10 |
| 081802-RZ1-45          | 0.199866 | 0.005243 | 13.315696 | 0.343143 | 0.485411 | 0.006603 | 2825 | 47   | 2702 | 24 | 2551 | 29 | 2825 | 47  |
| 081802-RZ1-14          | 0.200619 | 0.003928 | 14.875455 | 0.286957 | 0.534804 | 0.004640 | 2831 | 32   | 2807 | 18 | 2762 | 20 | 2831 | 32  |
| 081802-RZ1-53          | 0.211597 | 0.003715 | 13.665010 | 0.247856 | 0.466420 | 0.003850 | 2918 | 23   | 2727 | 17 | 2468 | 17 | 2918 | 23  |
| 081802-RZ1-34          | 0.213837 | 0.004800 | 14.152190 | 0.309737 | 0.477636 | 0.004311 | 2935 | 37   | 2760 | 21 | 2517 | 19 | 2935 | 37  |
| 081802-RZ1-05          | 0.231202 | 0.004559 | 19.070585 | 0.376421 | 0.594062 | 0.005301 | 3060 | 31   | 3045 | 19 | 3006 | 21 | 3060 | 31  |
| <b>173101-RZ1(K2a)</b> |          |          |           |          |          |          |      |      |      |    |      |    |      |     |
| 173101-RZ1-02          | 0.111823 | 0.002335 | 5.135507  | 0.108176 | 0.331715 | 0.002699 | 1829 | 38   | 1842 | 18 | 1847 | 13 | 1829 | 38  |
| 173101-RZ1-03          | 0.054998 | 0.002325 | 0.530904  | 0.022574 | 0.069880 | 0.000731 | 413  | 92   | 432  | 15 | 435  | 4  | 435  | 4   |
| 173101-RZ1-04          | 0.108467 | 0.002152 | 4.686593  | 0.096373 | 0.312057 | 0.002451 | 1774 | 35   | 1765 | 17 | 1751 | 12 | 1774 | 35  |
| 173101-RZ1-05          | 0.059926 | 0.001274 | 0.799962  | 0.018010 | 0.096408 | 0.000826 | 611  | 51   | 597  | 10 | 593  | 5  | 593  | 5   |
| 173101-RZ1-17          | 0.166891 | 0.003418 | 11.137144 | 0.227879 | 0.481198 | 0.004207 | 2528 | 35   | 2535 | 19 | 2532 | 18 | 2528 | 35  |
| 173101-RZ1-19          | 0.163775 | 0.003515 | 10.902298 | 0.230380 | 0.479454 | 0.004391 | 2495 | 36   | 2515 | 20 | 2525 | 19 | 2495 | 36  |
| 173101-RZ1-42          | 0.081347 | 0.002329 | 2.328098  | 0.066695 | 0.206425 | 0.002075 | 1231 | 56   | 1221 | 20 | 1210 | 11 | 1231 | 56  |
| 173101-RZ1-43          | 0.123492 | 0.003504 | 6.257621  | 0.168099 | 0.364793 | 0.003378 | 2007 | 45   | 2013 | 24 | 2005 | 16 | 2007 | 45  |
| 173101-RZ1-45          | 0.148548 | 0.007309 | 9.117795  | 0.394211 | 0.440432 | 0.004199 | 2329 | 85   | 2350 | 40 | 2353 | 19 | 2329 | 85  |
| 173101-RZ1-46          | 0.054746 | 0.003856 | 0.545258  | 0.034228 | 0.071446 | 0.000727 | 467  | 159  | 442  | 22 | 445  | 4  | 445  | 4   |
| 173101-RZ1-50          | 0.103585 | 0.008191 | 4.534561  | 0.312014 | 0.311379 | 0.002554 | 1700 | 146  | 1737 | 57 | 1747 | 13 | 1700 | 146 |
| 173101-RZ1-54          | 0.056576 | 0.002998 | 0.632346  | 0.031463 | 0.080922 | 0.000996 | 476  | 117  | 498  | 20 | 502  | 6  | 502  | 6   |
| 173101-RZ1-59          | 0.115016 | 0.002525 | 5.382141  | 0.117131 | 0.337725 | 0.002832 | 1880 | 40   | 1882 | 19 | 1876 | 14 | 1880 | 40  |
| 173101-RZ1-60          | 0.114477 | 0.002273 | 5.260867  | 0.106540 | 0.331259 | 0.002422 | 1872 | 36   | 1863 | 17 | 1844 | 12 | 1872 | 36  |
| 173101-RZ1-09          | 0.048192 | 0.002725 | 0.124945  | 0.006807 | 0.018932 | 0.000248 | 109  | 126  | 120  | 6  | 121  | 2  | 121  | 2   |
| 173101-RZ1-20          | 0.055099 | 0.002215 | 0.463631  | 0.017520 | 0.060789 | 0.000695 | 417  | 89   | 387  | 12 | 380  | 4  | 380  | 4   |
| 173101-RZ1-23          | 0.064032 | 0.001612 | 1.193776  | 0.029068 | 0.134164 | 0.001162 | 743  | 54   | 798  | 13 | 812  | 7  | 812  | 7   |
| 173101-RZ1-24          | 0.048835 | 0.004482 | 0.130156  | 0.009757 | 0.019771 | 0.000394 | 139  | 204  | 124  | 9  | 126  | 2  | 126  | 2   |
| 173101-RZ1-25          | 0.116773 | 0.002619 | 5.510668  | 0.122047 | 0.338637 | 0.003144 | 1907 | 40   | 1902 | 19 | 1880 | 15 | 1907 | 40  |
| 173101-RZ1-30          | 0.112587 | 0.002968 | 5.014059  | 0.130282 | 0.321548 | 0.003201 | 1843 | 47   | 1822 | 22 | 1797 | 16 | 1843 | 47  |
| 173101-RZ1-41          | 0.189441 | 0.004148 | 13.482770 | 0.293905 | 0.512551 | 0.004601 | 2739 | 36   | 2714 | 21 | 2668 | 20 | 2739 | 36  |
| 173101-RZ1-44          | 0.061457 | 0.004510 | 0.911651  | 0.059429 | 0.109405 | 0.002253 | 654  | 153  | 658  | 32 | 669  | 13 | 669  | 13  |
| 173101-RZ1-51          | 0.050206 | 0.003896 | 0.300142  | 0.021629 | 0.042831 | 0.000609 | 211  | 181  | 267  | 17 | 270  | 4  | 270  | 4   |
| 173101-RZ1-56          | 0.056504 | 0.002138 | 0.554298  | 0.020469 | 0.070837 | 0.000759 | 472  | 83   | 448  | 13 | 441  | 5  | 441  | 5   |
| 173101-RZ1-57          | 0.170199 | 0.003769 | 11.093904 | 0.245315 | 0.469586 | 0.003889 | 2561 | 37   | 2531 | 21 | 2482 | 17 | 2561 | 37  |
| 173101-RZ1-10          | 0.077029 | 0.001663 | 1.890889  | 0.042802 | 0.177512 | 0.001856 | 1122 | 43   | 1078 | 15 | 1053 | 10 | 1122 | 43  |
| 173101-RZ1-15          | 0.066603 | 0.002408 | 1.106616  | 0.036521 | 0.121199 | 0.001214 | 826  | 75   | 757  | 18 | 737  | 7  | 737  | 7   |
| 173101-RZ1-16          | 0.113060 | 0.002136 | 4.987449  | 0.092283 | 0.318156 | 0.002333 | 1850 | 34   | 1817 | 16 | 1781 | 11 | 1850 | 34  |
| 173101-RZ1-18          | 0.159098 | 0.003443 | 9.764626  | 0.203440 | 0.442473 | 0.003477 | 2446 | 37   | 2413 | 19 | 2362 | 16 | 2446 | 37  |
| 173101-RZ1-22          | 0.055127 | 0.002139 | 0.606087  | 0.022289 | 0.079706 | 0.000967 | 417  | 87   | 481  | 14 | 494  | 6  | 494  | 6   |
| 173101-RZ1-26          | 0.113048 | 0.002373 | 4.920304  | 0.101287 | 0.312572 | 0.002505 | 1850 | 38   | 1806 | 17 | 1753 | 12 | 1850 | 38  |
| 173101-RZ1-29          | 0.107855 | 0.004363 | 4.396389  | 0.173303 | 0.296943 | 0.004362 | 1765 | 74   | 1712 | 33 | 1676 | 22 | 1765 | 74  |
| 173101-RZ1-47          | 0.103800 | 0.008119 | 4.793284  | 0.325913 | 0.328443 | 0.002719 | 1694 | 144  | 1784 | 57 | 1831 | 13 | 1694 | 144 |
| 173101-RZ1-48          | 0.080790 | 0.007799 | 2.632693  | 0.220984 | 0.231599 | 0.002148 | 1217 | 191  | 1310 | 62 | 1343 | 11 | 1217 | 191 |
| 173101-RZ1-01          | 0.132796 | 0.002980 | 6.628444  | 0.149653 | 0.360330 | 0.003117 | 2135 | 39   | 2063 | 20 | 1984 | 15 | 2135 | 39  |
| 173101-RZ1-06          | 0.053735 | 0.002755 | 0.511679  | 0.024895 | 0.070075 | 0.000930 | 361  | 117  | 420  | 17 | 437  | 6  | 437  | 6   |
| 173101-RZ1-08          | 0.068304 | 0.002494 | 1.184396  | 0.042904 | 0.125765 | 0.001323 | 880  | -124 | 793  | 20 | 764  | 8  | 764  | 8   |
| 173101-RZ1-12          | 0.170262 | 0.003948 | 10.622009 | 0.248361 | 0.450517 | 0.004492 | 2561 | 39   | 2491 | 22 | 2398 | 20 | 2561 | 39  |
| 173101-RZ1-32          | 0.052515 | 0.001755 | 0.265338  | 0.008869 | 0.036402 | 0.000392 | 309  | 76   | 239  | 7  | 230  | 2  | 230  | 2   |
| 173101-RZ1-36          | 0.095962 | 0.003574 | 3.311433  | 0.122546 | 0.247792 | 0.003192 | 1547 | 70   | 1484 | 29 | 1427 | 17 | 1547 | 70  |
| 173101-RZ1-39          | 0.075561 | 0.002323 | 1.725250  | 0.052829 | 0.164483 | 0.001777 | 1083 | 62   | 1018 | 20 | 982  | 10 | 982  | 10  |
| 173101-RZ1-53          | 0.101720 | 0.004610 | 4.506050  | 0.186219 | 0.319793 | 0.003964 | 1657 | 85   | 1732 | 34 | 1789 | 19 | 1657 | 85  |
| 173101-RZ1-58          | 0.052056 | 0.001723 | 0.235036  | 0.007458 | 0.032697 | 0.000310 | 287  | 76   | 214  | 6  | 207  | 2  | 207  | 2   |
| 173101-RZ1-11          | 0.118202 | 0.002258 | 5.174074  | 0.099196 | 0.315981 | 0.002478 | 1929 | 35   | 1848 | 16 | 1770 | 12 | 1929 | 35  |
| 173101-RZ1-13          | 0.059005 | 0.002438 | 0.545787  | 0.021311 | 0.067645 | 0.000868 | 569  | 89   | 442  | 14 | 422  | 5  | 422  | 5   |
| 173101-RZ1-14          | 0.162010 | 0.003105 | 9.595585  | 0.200485 | 0.426374 | 0.004164 | 2477 | 32   | 2397 | 19 | 2289 | 19 | 2477 | 32  |
| 173101-RZ1-21          | 0.151551 | 0.002777 | 8.417407  | 0.152497 | 0.399352 | 0.003023 | 2365 | 31   | 2277 | 17 | 2166 | 14 | 2365 | 31  |
| 173101-RZ1-33          | 0.121369 | 0.003746 | 5.365162  | 0.155660 | 0.319643 | 0.003415 | 1976 | 55   | 1879 | 25 | 1788 | 17 | 1976 | 55  |
| 173101-RZ1-34          | 0.057077 | 0.004828 | 0.403598  | 0.030605 | 0.052555 | 0.001072 | 494  | 189  | 344  | 22 | 330  | 7  | 330  | 7   |
| 173101-RZ1-35          | 0.129304 | 0.004062 | 6.176437  | 0.188581 | 0.344094 | 0.004196 | 2089 | 55   | 2001 | 27 | 1906 | 20 | 2089 | 55  |
| 173101-RZ1-40          | 0.057025 | 0.002131 | 0.461502  | 0.016590 | 0.058529 | 0.000588 | 500  | 81   | 385  | 12 | 367  | 4  | 367  | 4   |
| 173101-RZ1-49          | 0.051151 | 0.005123 | 0.497078  | 0.043905 | 0.069004 | 0.000711 | 256  | 209  | 410  | 30 | 430  | 4  | 430  | 4   |
| 173101-RZ1-55          | 0.113623 | 0.003223 | 4.591338  | 0.127304 | 0.291491 | 0.003038 | 1858 | 52   | 1748 | 23 | 1649 | 15 | 1858 | 52  |
| 173101-RZ1-07          | 0.059564 | 0.003518 | 1.069420  | 0.065112 | 0.129893 | 0.002087 | 587  | 129  | 738  | 32 | 787  | 12 | 787  | 12  |
| 173101-RZ1-28          | 0.112368 | 0.002402 | 4.425768  | 0.091945 | 0.283531 | 0.002102 | 1839 | 39   | 1717 | 17 | 1609 | 11 | 1839 | 39  |
| 173101-RZ1-31          | 0.047692 | 0.002555 | 0.265165  | 0.014487 | 0.040288 | 0.000560 | 83   | 122  | 239  | 12 | 255  | 3  | 255  | 3   |
| 173101-RZ1-37          | 0.119083 | 0.003511 | 5.002182  | 0.143265 | 0.301677 | 0.003002 | 1942 | 53   | 1820 | 24 | 1700 | 15 | 1942 | 53  |
| 173101-RZ1-38          | 0.062524 | 0.002214 | 0.699792  | 0.024746 | 0.080662 | 0.001125 | 700  | 75   | 539  | 15 | 500  | 7  | 500  | 7   |
| 173101-RZ1-27          | 0.139360 | 0.003030 | 6.679166  | 0.179097 | 0.341728 | 0.003884 | 2220 | 38   | 2070 | 24 | 1895 | 19 | 2220 | 38  |
| 173101-RZ1-52          | 0.102695 | 0.005047 | 3.350646  | 0.145118 | 0.233195 | 0.001863 | 1673 | 86   | 1493 | 34 | 1351 | 10 | 1673 | 86  |
| <b>080304-RZ1(K2a)</b> |          |          |           |          |          |          |      |      |      |    |      |    |      |     |
| 080304-RZ1-19          | 0.051215 | 0.001027 | 0.096794  | 0.002373 | 0.013705 | 0.000231 | 250  | 44   | 94   | 2  | 88   | 1  | 88   | 1   |
| 080304-RZ1-65          | 0.047956 | 0.000418 | 0.107414  | 0.001568 | 0.016243 | 0.000225 | 98   | 8    | 104  | 1  | 104  | 1  | 104  | 1   |
| 080304-RZ1-30          | 0.050440 | 0.000617 | 0.130130  | 0.004409 | 0.018709 | 0.000548 | 217  | 42   | 124  | 4  | 119  | 3  | 119  | 3   |
| 080304-RZ1-26          | 0.048730 | 0.000500 | 0.126057  | 0.002925 | 0.018769 | 0.000426 | 200  | 22   | 121  | 3  | 120  | 3  | 120  | 3   |
| 080304-RZ1-36          | 0.048483 | 0.000381 | 0.126730  | 0.002792 |          |          |      |      |      |    |      |    |      |     |

|                        |          |          |           |          |          |          |      |      |      |    |      |    |      |    |
|------------------------|----------|----------|-----------|----------|----------|----------|------|------|------|----|------|----|------|----|
| 080304-RZ1-50          | 0.066000 | 0.000446 | 1.180731  | 0.019951 | 0.129729 | 0.002047 | 806  | -584 | 792  | 9  | 786  | 12 | 786  | 12 |
| 080304-RZ1-64          | 0.067143 | 0.000749 | 1.210642  | 0.023184 | 0.130700 | 0.001762 | 843  | 22   | 805  | 11 | 792  | 10 | 792  | 10 |
| 080304-RZ1-16          | 0.070028 | 0.000487 | 1.270093  | 0.026466 | 0.131511 | 0.002974 | 929  | 114  | 832  | 12 | 796  | 17 | 796  | 17 |
| 080304-RZ1-09          | 0.064864 | 0.000766 | 1.177782  | 0.027912 | 0.131594 | 0.003182 | 770  | 42   | 790  | 13 | 797  | 18 | 797  | 18 |
| 080304-RZ1-56          | 0.069114 | 0.000336 | 1.380019  | 0.025216 | 0.144779 | 0.002561 | 902  | 11   | 880  | 11 | 872  | 14 | 872  | 14 |
| 080304-RZ1-53          | 0.072786 | 0.000342 | 1.656460  | 0.031764 | 0.165026 | 0.003116 | 1009 | 11   | 992  | 12 | 985  | 17 | 985  | 17 |
| 080304-RZ1-45          | 0.076326 | 0.000401 | 1.765058  | 0.038055 | 0.167674 | 0.003434 | 1103 | 8    | 1033 | 14 | 999  | 19 | 999  | 19 |
| 080304-RZ1-46          | 0.071970 | 0.000349 | 1.679770  | 0.031231 | 0.169252 | 0.003103 | 985  | 8    | 1001 | 12 | 1008 | 17 | 985  | 8  |
| 080304-RZ1-11          | 0.073290 | 0.000684 | 1.761853  | 0.044174 | 0.174236 | 0.004695 | 1022 | 17   | 1032 | 16 | 1035 | 26 | 1022 | 17 |
| 080304-RZ1-08          | 0.078556 | 0.000663 | 2.003318  | 0.045814 | 0.184822 | 0.004444 | 1161 | 17   | 1117 | 16 | 1093 | 24 | 1161 | 17 |
| 080304-RZ1-12          | 0.085419 | 0.000788 | 2.487607  | 0.047019 | 0.211067 | 0.004245 | 1325 | 17   | 1268 | 14 | 1235 | 23 | 1325 | 17 |
| 080304-RZ1-05          | 0.100376 | 0.000637 | 3.222401  | 0.072698 | 0.232683 | 0.005218 | 1631 | 11   | 1463 | 18 | 1349 | 27 | 1631 | 11 |
| 080304-RZ1-33          | 0.111114 | 0.001022 | 4.759319  | 0.131874 | 0.310510 | 0.007077 | 1818 | 31   | 1778 | 24 | 1743 | 35 | 1818 | 31 |
| 080304-RZ1-51          | 0.108980 | 0.000599 | 4.667798  | 0.085031 | 0.310584 | 0.005421 | 1783 | -3   | 1761 | 16 | 1744 | 27 | 1783 | -3 |
| 080304-RZ1-28          | 0.117103 | 0.001036 | 5.254282  | 0.134614 | 0.325425 | 0.007390 | 1922 | 16   | 1861 | 22 | 1816 | 36 | 1922 | 16 |
| 080304-RZ1-37          | 0.116186 | 0.000670 | 5.241906  | 0.094326 | 0.327192 | 0.005639 | 1898 | 10   | 1859 | 16 | 1825 | 28 | 1898 | 10 |
| 080304-RZ1-27          | 0.110806 | 0.000907 | 4.999755  | 0.146929 | 0.327288 | 0.009144 | 1813 | 12   | 1819 | 25 | 1825 | 45 | 1813 | 12 |
| 080304-RZ1-10          | 0.114837 | 0.001204 | 5.189516  | 0.161850 | 0.327672 | 0.011360 | 1877 | 17   | 1851 | 27 | 1827 | 55 | 1877 | 17 |
| 080304-RZ1-42          | 0.109217 | 0.000635 | 4.940521  | 0.074862 | 0.328040 | 0.004858 | 1787 | 11   | 1809 | 13 | 1829 | 24 | 1787 | 11 |
| 080304-RZ1-01          | 0.118340 | 0.000555 | 5.367486  | 0.105760 | 0.328834 | 0.006292 | 1931 | 24   | 1880 | 17 | 1833 | 31 | 1931 | 24 |
| 080304-RZ1-41          | 0.116888 | 0.000632 | 5.303512  | 0.128104 | 0.329047 | 0.007996 | 1909 | 25   | 1869 | 21 | 1834 | 39 | 1909 | 25 |
| 080304-RZ1-47          | 0.115415 | 0.000541 | 5.269031  | 0.083210 | 0.331030 | 0.004917 | 1887 | 25   | 1864 | 14 | 1843 | 24 | 1887 | 25 |
| 080304-RZ1-29          | 0.112836 | 0.001147 | 5.151112  | 0.162749 | 0.331182 | 0.009787 | 1856 | 19   | 1845 | 27 | 1844 | 47 | 1856 | 19 |
| 080304-RZ1-14          | 0.115303 | 0.000806 | 5.268427  | 0.132123 | 0.331212 | 0.008674 | 1885 | 12   | 1864 | 22 | 1844 | 42 | 1885 | 12 |
| 080304-RZ1-38          | 0.114155 | 0.000724 | 5.222201  | 0.114190 | 0.331722 | 0.006833 | 1866 | 14   | 1856 | 19 | 1847 | 33 | 1866 | 14 |
| 080304-RZ1-43          | 0.115600 | 0.000571 | 5.313928  | 0.107926 | 0.333320 | 0.006552 | 1900 | 8    | 1871 | 18 | 1854 | 32 | 1900 | 8  |
| 080304-RZ1-59          | 0.115093 | 0.000536 | 5.308862  | 0.094916 | 0.334440 | 0.005777 | 1881 | 7    | 1870 | 16 | 1860 | 28 | 1881 | 7  |
| 080304-RZ1-31          | 0.126316 | 0.001260 | 6.118220  | 0.176341 | 0.351362 | 0.009291 | 2047 | 17   | 1993 | 25 | 1941 | 44 | 2047 | 17 |
| 080304-RZ1-39          | 0.131080 | 0.001256 | 6.396430  | 0.221924 | 0.353401 | 0.009794 | 2113 | 17   | 2032 | 31 | 1951 | 47 | 2113 | 17 |
| 080304-RZ1-22          | 0.139378 | 0.001932 | 7.012881  | 0.135593 | 0.365148 | 0.007293 | 2220 | 22   | 2113 | 18 | 2007 | 35 | 2220 | 22 |
| 080304-RZ1-63          | 0.149890 | 0.000821 | 9.015657  | 0.152203 | 0.436057 | 0.006582 | 2346 | 8    | 2340 | 16 | 2333 | 30 | 2346 | 8  |
| 080304-RZ1-13          | 0.167413 | 0.001264 | 10.745919 | 0.232237 | 0.465230 | 0.010586 | 2532 | 13   | 2501 | 21 | 2463 | 47 | 2532 | 13 |
| 080304-RZ1-25          | 0.162690 | 0.001118 | 10.463357 | 0.233702 | 0.466450 | 0.009843 | 2484 | 12   | 2477 | 21 | 2468 | 43 | 2484 | 12 |
| 080304-RZ1-04          | 0.162632 | 0.000886 | 10.476555 | 0.181110 | 0.466952 | 0.008104 | 2483 | 9    | 2478 | 17 | 2470 | 36 | 2483 | 9  |
| 080304-RZ1-07          | 0.164896 | 0.001219 | 10.668470 | 0.260050 | 0.468892 | 0.011717 | 2506 | 13   | 2495 | 23 | 2479 | 52 | 2506 | 13 |
| 080304-RZ1-03          | 0.165793 | 0.000813 | 10.730934 | 0.227614 | 0.469196 | 0.009880 | 2517 | 8    | 2500 | 20 | 2480 | 44 | 2517 | 8  |
| 080304-RZ1-23          | 0.199553 | 0.001182 | 14.635724 | 0.306011 | 0.531909 | 0.010957 | 2833 | 8    | 2792 | 21 | 2749 | 46 | 2833 | 8  |
| <b>160801-RZ2(K2a)</b> |          |          |           |          |          |          |      |      |      |    |      |    |      |    |
| 160801-RZ2-49          | 0.048561 | 0.000649 | 0.105478  | 0.002514 | 0.015740 | 0.000378 | 128  | 125  | 102  | 2  | 101  | 2  | 101  | 2  |
| 160801-RZ2-18          | 0.049167 | 0.000597 | 0.112095  | 0.002332 | 0.016528 | 0.000270 | 167  | 28   | 108  | 2  | 106  | 2  | 106  | 2  |
| 160801-RZ2-04          | 0.048757 | 0.000340 | 0.126849  | 0.002562 | 0.018858 | 0.000348 | 200  | 17   | 121  | 2  | 120  | 2  | 120  | 2  |
| 160801-RZ2-50          | 0.049493 | 0.000528 | 0.175222  | 0.004417 | 0.025660 | 0.000690 | 172  | 42   | 164  | 4  | 163  | 4  | 163  | 4  |
| 160801-RZ2-38          | 0.051572 | 0.001738 | 0.264839  | 0.005456 | 0.037199 | 0.000782 | 265  | 92   | 239  | 4  | 235  | 5  | 235  | 5  |
| 160801-RZ2-12          | 0.050775 | 0.000449 | 0.261447  | 0.004866 | 0.037337 | 0.000701 | 232  | 8    | 236  | 4  | 236  | 4  | 236  | 4  |
| 160801-RZ2-62          | 0.053802 | 0.000484 | 0.286476  | 0.005309 | 0.038575 | 0.000733 | 361  | 3    | 256  | 4  | 244  | 5  | 244  | 5  |
| 160801-RZ2-58          | 0.050934 | 0.000406 | 0.272548  | 0.005230 | 0.038767 | 0.000797 | 239  | 17   | 245  | 4  | 245  | 5  | 245  | 5  |
| 160801-RZ2-25          | 0.054705 | 0.000868 | 0.296005  | 0.006784 | 0.039222 | 0.000620 | 467  | 39   | 263  | 5  | 248  | 4  | 248  | 4  |
| 160801-RZ2-08          | 0.050784 | 0.000311 | 0.276565  | 0.005206 | 0.039478 | 0.000740 | 232  | 3    | 248  | 4  | 250  | 5  | 250  | 5  |
| 160801-RZ2-20          | 0.060009 | 0.002937 | 0.341065  | 0.019601 | 0.041123 | 0.000798 | 606  | 106  | 298  | 15 | 260  | 5  | 260  | 5  |
| 160801-RZ2-11          | 0.051459 | 0.000434 | 0.294324  | 0.007394 | 0.041466 | 0.001024 | 261  | 119  | 262  | 6  | 262  | 6  | 262  | 6  |
| 160801-RZ2-02          | 0.052175 | 0.000435 | 0.298436  | 0.004930 | 0.041479 | 0.000724 | 300  | 17   | 265  | 4  | 262  | 4  | 262  | 4  |
| 160801-RZ2-61          | 0.055847 | 0.001029 | 0.320042  | 0.006245 | 0.041578 | 0.000974 | 456  | 44   | 282  | 5  | 263  | 6  | 263  | 6  |
| 160801-RZ2-24          | 0.093875 | 0.003740 | 0.554232  | 0.031338 | 0.042602 | 0.000934 | 1506 | 76   | 448  | 20 | 269  | 6  | 269  | 6  |
| 160801-RZ2-41          | 0.053663 | 0.002015 | 0.317664  | 0.009681 | 0.042845 | 0.001187 | 367  | 83   | 280  | 7  | 270  | 7  | 270  | 7  |
| 160801-RZ2-03          | 0.052162 | 0.000268 | 0.315459  | 0.006301 | 0.043843 | 0.000870 | 300  | 17   | 278  | 5  | 277  | 5  | 277  | 5  |
| 160801-RZ2-34          | 0.060339 | 0.002856 | 0.372070  | 0.020781 | 0.044550 | 0.000899 | 617  | 92   | 321  | 15 | 281  | 6  | 281  | 6  |
| 160801-RZ2-30          | 0.053258 | 0.000437 | 0.349850  | 0.007673 | 0.047640 | 0.001146 | 339  | 3    | 305  | 6  | 300  | 7  | 300  | 7  |
| 160801-RZ2-37          | 0.077365 | 0.003604 | 0.539955  | 0.013995 | 0.050825 | 0.001397 | 1131 | 93   | 438  | 9  | 320  | 9  | 320  | 9  |
| 160801-RZ2-15          | 0.055514 | 0.000489 | 0.476359  | 0.011229 | 0.062201 | 0.001301 | 432  | 17   | 396  | 8  | 389  | 8  | 389  | 8  |
| 160801-RZ2-09          | 0.057340 | 0.000545 | 0.568334  | 0.014211 | 0.071827 | 0.001580 | 506  | 36   | 457  | 9  | 447  | 10 | 447  | 10 |
| 160801-RZ2-07          | 0.055434 | 0.000393 | 0.559815  | 0.012136 | 0.073207 | 0.001546 | 432  | 3    | 451  | 8  | 455  | 9  | 455  | 9  |
| 160801-RZ2-46          | 0.056186 | 0.001076 | 0.568859  | 0.011777 | 0.073349 | 0.001596 | 461  | 25   | 457  | 8  | 456  | 10 | 456  | 10 |
| 160801-RZ2-01          | 0.056710 | 0.000567 | 0.573950  | 0.013813 | 0.073360 | 0.001580 | 480  | 22   | 461  | 9  | 456  | 10 | 456  | 10 |
| 160801-RZ2-10          | 0.055343 | 0.000401 | 0.563469  | 0.013055 | 0.073807 | 0.001714 | 433  | 17   | 454  | 9  | 459  | 10 | 459  | 10 |
| 160801-RZ2-40          | 0.057539 | 0.002446 | 0.611157  | 0.016559 | 0.076943 | 0.002014 | 522  | 94   | 484  | 10 | 478  | 12 | 478  | 12 |
| 160801-RZ2-29          | 0.065169 | 0.000567 | 0.726149  | 0.018688 | 0.080763 | 0.001955 | 789  | 20   | 554  | 11 | 501  | 12 | 501  | 12 |
| 160801-RZ2-22          | 0.064201 | 0.000396 | 1.057319  | 0.017581 | 0.119410 | 0.001956 | 750  | 17   | 733  | 9  | 727  | 11 | 727  | 11 |
| 160801-RZ2-60          | 0.072687 | 0.001052 | 1.240238  | 0.027659 | 0.123660 | 0.002949 | 1006 | 32   | 819  | 13 | 752  | 17 | 752  | 17 |
| 160801-RZ2-51          | 0.077676 | 0.000509 | 1.344389  | 0.039050 | 0.125415 | 0.003770 | 1139 | -3   | 865  | 17 | 762  | 22 | 762  | 22 |
| 160801-RZ2-53          | 0.066423 | 0.001041 | 1.224295  | 0.028078 | 0.133692 | 0.003367 | 820  | 33   | 812  | 13 | 809  | 19 | 809  | 19 |
| 160801-RZ2-17          | 0.064969 | 0.000388 | 1.208953  | 0.025746 | 0.134910 | 0.002742 | 772  | 13   | 805  | 12 | 816  | 16 | 816  | 16 |
| 160801-RZ2-48          | 0.067106 | 0.000859 | 1.256564  | 0.028858 | 0.135696 | 0.003394 | 843  | 28   | 826  | 13 | 820  | 19 | 820  | 19 |
| 160801-RZ2-65          | 0.066606 | 0.000344 | 1.252554  | 0.027015 | 0.136263 | 0.003220 | 826  | 11   | 825  | 12 | 823  | 18 | 823  | 18 |
| 160801-RZ2-33          | 0.070318 | 0.001235 | 1.366933  | 0.027255 | 0.140917 | 0.002962 | 939  | 37   | 875  | 12 | 850  | 17 | 850  | 17 |
| 160801-RZ2-06          | 0.070406 | 0.000328 | 1.541481  | 0.027704 | 0.158720 | 0.002897 | 940  | 6    | 947  | 11 | 950  | 16 | 950  | 16 |
| 160801-RZ2-43          | 0.069864 | 0.002080 | 1.540364  | 0.038346 | 0.159686 | 0.004008 | 924  | 61   | 947  | 15 | 955  | 22 | 955  | 22 |
| 160801-RZ2-05          | 0.067107 | 0.000320 | 1.484093  | 0.024232 | 0.160323 | 0.002627 | 843  | 8    | 924  | 10 | 959  | 15 | 959  | 15 |
| 1                      |          |          |           |          |          |          |      |      |      |    |      |    |      |    |

|                        |          |          |           |          |          |          |      |     |      |    |      |    |      |    |
|------------------------|----------|----------|-----------|----------|----------|----------|------|-----|------|----|------|----|------|----|
| 160801-RZ2-39          | 0.171420 | 0.006279 | 11.100828 | 0.250650 | 0.468982 | 0.010941 | 2571 | 61  | 2532 | 22 | 2479 | 48 | 2571 | 61 |
| 160801-RZ2-56          | 0.164801 | 0.000995 | 10.972977 | 0.221355 | 0.482405 | 0.010248 | 2505 | 10  | 2521 | 19 | 2538 | 45 | 2505 | 10 |
| <b>160802-RZ1(K2a)</b> |          |          |           |          |          |          |      |     |      |    |      |    |      |    |
| 160802-RZ1-112         | 0.051160 | 0.003160 | 0.103880  | 0.006780 | 0.014880 | 0.00034  | 248  | 136 | 100  | 6  | 95   | 2  | 95   | 2  |
| 160802-RZ1-128         | 0.047990 | 0.003050 | 0.099720  | 0.006650 | 0.015200 | 0.00034  | 98   | 145 | 97   | 6  | 97   | 2  | 97   | 2  |
| 160802-RZ1-62          | 0.052860 | 0.003990 | 0.108810  | 0.008700 | 0.015250 | 0.00038  | 323  | 162 | 105  | 8  | 98   | 2  | 98   | 2  |
| 160802-RZ1-90          | 0.048020 | 0.002660 | 0.103210  | 0.005980 | 0.015330 | 0.00034  | 99   | 127 | 100  | 6  | 98   | 2  | 98   | 2  |
| 160802-RZ1-120         | 0.048380 | 0.007690 | 0.106710  | 0.018110 | 0.015420 | 0.00057  | 118  | 337 | 103  | 17 | 99   | 4  | 99   | 4  |
| 160802-RZ1-110         | 0.051860 | 0.002030 | 0.112190  | 0.004570 | 0.015490 | 0.00032  | 279  | 87  | 108  | 4  | 99   | 2  | 99   | 2  |
| 160802-RZ1-47          | 0.050180 | 0.003620 | 0.110150  | 0.008460 | 0.015580 | 0.00039  | 203  | 159 | 106  | 8  | 100  | 2  | 100  | 2  |
| 160802-RZ1-123         | 0.048870 | 0.003260 | 0.108330  | 0.007680 | 0.015780 | 0.00037  | 142  | 149 | 104  | 7  | 101  | 2  | 101  | 2  |
| 160802-RZ1-121         | 0.049920 | 0.005270 | 0.111450  | 0.012640 | 0.016030 | 0.00047  | 191  | 228 | 107  | 12 | 103  | 3  | 103  | 3  |
| 160802-RZ1-122         | 0.050960 | 0.002460 | 0.111930  | 0.005660 | 0.016060 | 0.00034  | 239  | 108 | 108  | 5  | 103  | 2  | 103  | 2  |
| 160802-RZ1-46          | 0.050330 | 0.002590 | 0.109520  | 0.005930 | 0.016070 | 0.00036  | 210  | 115 | 106  | 5  | 103  | 2  | 103  | 2  |
| 160802-RZ1-40          | 0.052010 | 0.003430 | 0.114830  | 0.008000 | 0.016110 | 0.00039  | 286  | 144 | 110  | 7  | 103  | 2  | 103  | 2  |
| 160802-RZ1-70          | 0.050880 | 0.002300 | 0.114200  | 0.005450 | 0.016260 | 0.00036  | 235  | 101 | 110  | 5  | 104  | 2  | 104  | 2  |
| 160802-RZ1-125         | 0.050610 | 0.004160 | 0.118520  | 0.010450 | 0.016750 | 0.00042  | 223  | 180 | 114  | 9  | 107  | 3  | 107  | 3  |
| 160802-RZ1-72          | 0.053620 | 0.002940 | 0.123120  | 0.007160 | 0.016850 | 0.00038  | 355  | 118 | 118  | 6  | 108  | 2  | 108  | 2  |
| 160802-RZ1-75          | 0.049210 | 0.001840 | 0.115270  | 0.004500 | 0.016950 | 0.00036  | 158  | 85  | 111  | 4  | 108  | 2  | 108  | 2  |
| 160802-RZ1-67          | 0.046730 | 0.001980 | 0.112330  | 0.004980 | 0.017200 | 0.00037  | 35   | 99  | 108  | 5  | 110  | 2  | 110  | 2  |
| 160802-RZ1-61          | 0.049810 | 0.005010 | 0.117740  | 0.012030 | 0.017320 | 0.00039  | 186  | 219 | 113  | 11 | 111  | 2  | 111  | 2  |
| 160802-RZ1-55          | 0.051860 | 0.004930 | 0.123130  | 0.012590 | 0.017370 | 0.00049  | 279  | 204 | 118  | 11 | 111  | 3  | 111  | 3  |
| 160802-RZ1-82          | 0.052920 | 0.002110 | 0.123960  | 0.005190 | 0.017460 | 0.00037  | 325  | 88  | 119  | 5  | 112  | 2  | 112  | 2  |
| 160802-RZ1-57          | 0.051390 | 0.001460 | 0.124240  | 0.003640 | 0.017560 | 0.00036  | 259  | 64  | 119  | 3  | 112  | 2  | 112  | 2  |
| 160802-RZ1-108         | 0.050430 | 0.001770 | 0.124990  | 0.004540 | 0.017640 | 0.00036  | 215  | 79  | 120  | 4  | 113  | 2  | 113  | 2  |
| 160802-RZ1-15          | 0.049330 | 0.002580 | 0.124340  | 0.006950 | 0.017910 | 0.00042  | 164  | 118 | 119  | 6  | 114  | 3  | 114  | 3  |
| 160802-RZ1-20          | 0.050800 | 0.002300 | 0.128850  | 0.006270 | 0.018140 | 0.00041  | 232  | 101 | 123  | 6  | 116  | 3  | 116  | 3  |
| 160802-RZ1-13          | 0.053180 | 0.005220 | 0.144330  | 0.015350 | 0.019440 | 0.00057  | 336  | 208 | 137  | 14 | 124  | 4  | 124  | 4  |
| 160802-RZ1-18          | 0.052740 | 0.002150 | 0.143460  | 0.006300 | 0.019690 | 0.00044  | 317  | 90  | 136  | 6  | 126  | 3  | 126  | 3  |
| 160802-RZ1-103         | 0.050900 | 0.001940 | 0.157060  | 0.006350 | 0.023070 | 0.00048  | 236  | 86  | 148  | 6  | 147  | 3  | 147  | 3  |
| 160802-RZ1-119         | 0.051490 | 0.002150 | 0.175450  | 0.007970 | 0.025070 | 0.00052  | 263  | 93  | 164  | 7  | 160  | 3  | 160  | 3  |
| 160802-RZ1-107         | 0.054880 | 0.001810 | 0.240140  | 0.008670 | 0.031750 | 0.00064  | 408  | 72  | 219  | 7  | 202  | 4  | 202  | 4  |
| 160802-RZ1-102         | 0.050150 | 0.001510 | 0.218920  | 0.007020 | 0.032260 | 0.00065  | 202  | 69  | 201  | 6  | 205  | 4  | 205  | 4  |
| 160802-RZ1-129         | 0.054030 | 0.001730 | 0.260750  | 0.009140 | 0.035350 | 0.0007   | 372  | 71  | 235  | 7  | 224  | 4  | 224  | 4  |
| 160802-RZ1-134         | 0.050570 | 0.001810 | 0.255460  | 0.010180 | 0.036430 | 0.00073  | 221  | 81  | 231  | 8  | 231  | 5  | 231  | 5  |
| 160802-RZ1-124         | 0.053110 | 0.001600 | 0.271910  | 0.008860 | 0.037210 | 0.00074  | 334  | 67  | 244  | 7  | 236  | 5  | 236  | 5  |
| 160802-RZ1-54          | 0.052480 | 0.002960 | 0.279900  | 0.018090 | 0.037650 | 0.00086  | 306  | 123 | 251  | 14 | 238  | 5  | 238  | 5  |
| 160802-RZ1-89          | 0.052010 | 0.001570 | 0.266790  | 0.008760 | 0.037850 | 0.00077  | 286  | 67  | 240  | 7  | 240  | 5  | 240  | 5  |
| 160802-RZ1-43          | 0.055790 | 0.003040 | 0.295520  | 0.018960 | 0.038150 | 0.0009   | 444  | 117 | 263  | 15 | 241  | 6  | 241  | 6  |
| 160802-RZ1-126         | 0.053710 | 0.002350 | 0.287140  | 0.014550 | 0.038420 | 0.00081  | 359  | 96  | 256  | 11 | 243  | 5  | 243  | 5  |
| 160802-RZ1-42          | 0.052430 | 0.003160 | 0.278530  | 0.019340 | 0.038770 | 0.00091  | 304  | 132 | 250  | 15 | 245  | 6  | 245  | 6  |
| 160802-RZ1-6           | 0.052230 | 0.003030 | 0.287680  | 0.019840 | 0.039640 | 0.00097  | 296  | 127 | 257  | 16 | 251  | 6  | 251  | 6  |
| 160802-RZ1-130         | 0.053360 | 0.001770 | 0.287450  | 0.010610 | 0.039650 | 0.00079  | 344  | 73  | 257  | 8  | 251  | 5  | 251  | 5  |
| 160802-RZ1-26          | 0.055390 | 0.002110 | 0.310490  | 0.013750 | 0.040430 | 0.00089  | 428  | 82  | 275  | 11 | 256  | 6  | 256  | 6  |
| 160802-RZ1-105         | 0.055470 | 0.003820 | 0.302150  | 0.025200 | 0.040680 | 0.001    | 431  | 147 | 268  | 20 | 257  | 6  | 257  | 6  |
| 160802-RZ1-32          | 0.052190 | 0.001530 | 0.298590  | 0.009820 | 0.041630 | 0.00088  | 294  | 66  | 265  | 8  | 263  | 5  | 263  | 5  |
| 160802-RZ1-2           | 0.054490 | 0.001690 | 0.337100  | 0.012060 | 0.043180 | 0.00095  | 391  | 67  | 295  | 9  | 273  | 6  | 273  | 6  |
| 160802-RZ1-9           | 0.050590 | 0.002390 | 0.312320  | 0.017350 | 0.043300 | 0.001    | 222  | 106 | 276  | 13 | 273  | 6  | 273  | 6  |
| 160802-RZ1-87          | 0.056600 | 0.002610 | 0.352890  | 0.019690 | 0.045210 | 0.00099  | 475  | 99  | 307  | 15 | 285  | 6  | 285  | 6  |
| 160802-RZ1-83          | 0.051470 | 0.001900 | 0.326000  | 0.013930 | 0.046680 | 0.00098  | 262  | 83  | 287  | 11 | 295  | 6  | 295  | 6  |
| 160802-RZ1-99          | 0.051490 | 0.003430 | 0.361380  | 0.030270 | 0.047020 | 0.00114  | 263  | 146 | 313  | 23 | 296  | 7  | 296  | 7  |
| 160802-RZ1-22          | 0.058750 | 0.003430 | 0.402270  | 0.029210 | 0.050990 | 0.00125  | 558  | 123 | 343  | 21 | 321  | 8  | 321  | 8  |
| 160802-RZ1-52          | 0.058060 | 0.001720 | 0.419710  | 0.014470 | 0.051910 | 0.00109  | 532  | 64  | 356  | 10 | 326  | 7  | 326  | 7  |
| 160802-RZ1-3           | 0.055580 | 0.002040 | 0.427630  | 0.019060 | 0.053870 | 0.0012   | 435  | 80  | 362  | 14 | 338  | 7  | 338  | 7  |
| 160802-RZ1-23          | 0.059500 | 0.002290 | 0.436890  | 0.020720 | 0.053910 | 0.0012   | 586  | 82  | 368  | 15 | 339  | 7  | 339  | 7  |
| 160802-RZ1-109         | 0.055050 | 0.002030 | 0.511360  | 0.023680 | 0.067480 | 0.0014   | 414  | 80  | 419  | 16 | 421  | 8  | 421  | 8  |
| 160802-RZ1-117         | 0.056960 | 0.001840 | 0.534160  | 0.021250 | 0.068400 | 0.00138  | 489  | 70  | 435  | 14 | 427  | 8  | 427  | 8  |
| 160802-RZ1-24          | 0.057390 | 0.002340 | 0.586400  | 0.031490 | 0.071030 | 0.0016   | 506  | 88  | 469  | 20 | 442  | 10 | 442  | 10 |
| 160802-RZ1-100         | 0.057180 | 0.002360 | 0.574270  | 0.031560 | 0.071650 | 0.00153  | 498  | 89  | 461  | 20 | 446  | 9  | 446  | 9  |
| 160802-RZ1-116         | 0.058950 | 0.001990 | 0.591840  | 0.025290 | 0.075420 | 0.00153  | 565  | 72  | 472  | 16 | 469  | 9  | 469  | 9  |
| 160802-RZ1-33          | 0.061970 | 0.002070 | 0.652030  | 0.028340 | 0.076680 | 0.00167  | 673  | 70  | 510  | 17 | 476  | 10 | 476  | 10 |
| 160802-RZ1-85          | 0.063410 | 0.002690 | 0.758320  | 0.045730 | 0.086130 | 0.00189  | 722  | 87  | 573  | 26 | 533  | 11 | 533  | 11 |
| 160802-RZ1-59          | 0.065100 | 0.002530 | 0.783140  | 0.042880 | 0.086800 | 0.00191  | 778  | 80  | 587  | 24 | 537  | 11 | 537  | 11 |
| 160802-RZ1-58          | 0.064390 | 0.001570 | 0.909510  | 0.026530 | 0.102620 | 0.00211  | 755  | 51  | 657  | 14 | 630  | 12 | 630  | 12 |
| 160802-RZ1-127         | 0.066350 | 0.002520 | 0.946110  | 0.053500 | 0.109280 | 0.00229  | 817  | 77  | 676  | 28 | 669  | 13 | 669  | 13 |
| 160802-RZ1-31          | 0.070090 | 0.001690 | 1.166700  | 0.034950 | 0.124950 | 0.00262  | 931  | 49  | 785  | 16 | 759  | 15 | 759  | 15 |
| 160802-RZ1-63          | 0.068970 | 0.002160 | 1.169690  | 0.054160 | 0.126760 | 0.00269  | 898  | 63  | 787  | 25 | 769  | 15 | 769  | 15 |
| 160802-RZ1-81          | 0.067100 | 0.001560 | 1.198460  | 0.032930 | 0.127770 | 0.00256  | 841  | 48  | 800  | 15 | 775  | 15 | 775  | 15 |
| 160802-RZ1-101         | 0.067920 | 0.001900 | 1.221980  | 0.047920 | 0.134060 | 0.00271  | 866  | 57  | 811  | 22 | 811  | 15 | 811  | 15 |
| 160802-RZ1-104         | 0.071660 | 0.002750 | 1.285250  | 0.080310 | 0.136230 | 0.00293  | 976  | 76  | 839  | 36 | 823  | 17 | 823  | 17 |
| 160802-RZ1-41          | 0.069230 | 0.003150 | 1.400220  | 0.109890 | 0.141120 | 0.00332  | 906  | 91  | 889  | 46 | 851  | 19 | 851  | 19 |
| 160802-RZ1-93          | 0.067390 | 0.002760 | 1.324090  | 0.091380 | 0.141130 | 0.00311  | 850  | 83  | 856  | 40 | 851  | 18 | 851  | 18 |
| 160802-RZ1-10          | 0.074030 | 0.003240 | 1.342330  | 0.096510 | 0.141170 | 0.00336  | 1042 | 86  | 864  | 42 | 851  | 19 | 851  | 19 |
| 160802-RZ1-14          | 0.069670 | 0.002230 | 1.385980  | 0.069060 | 0.141310 | 0.00313  | 919  | 65  | 883  | 29 | 852  | 18 | 852  | 18 |
| 160802-RZ1-65          | 0.076310 | 0.001920 | 1.494910  | 0.050750 | 0.142910 | 0.00294  | 1103 | 49  | 928  | 21 | 861  | 17 | 861  | 17 |
| 160802-RZ1-29          | 0.072190 | 0.001900 | 1.445790  | 0.053120 | 0.144600 | 0.00308  | 991  | 52  | 908  | 22 | 871  | 17 | 871  | 17 |
| 160802-RZ1-88          | 0.075130 | 0.002210 | 1.622780  | 0.074550 | 0.163450 | 0.00338  | 1072 | 58  | 979  | 29 | 976  | 19 | 976  | 19 |
| 160802-RZ1-71          | 0.075040 | 0.001950 | 1.893270  | 0.073670 | 0.178240 | 0.00367  | 1070 | 51  | 1079 | 26 | 1057 | 20 | 1070 | 51 |
| 160802-RZ1-12          | 0.079800 | 0.001740 | 2.227620  | 0.059010 | 0.201330 | 0.00427  | 1192 | 42  | 1190 | 19 | 1182 | 23 |      |    |



|                |          |          |           |          |          |         |      |    |      |    |      |    |      |    |
|----------------|----------|----------|-----------|----------|----------|---------|------|----|------|----|------|----|------|----|
| 160802-RZ1-111 | 0.165070 | 0.003490 | 10.647530 | 0.302770 | 0.470270 | 0.00917 | 2508 | 35 | 2493 | 26 | 2485 | 40 | 2508 | 35 |
| 160802-RZ1-39  | 0.166020 | 0.003570 | 11.619490 | 0.413000 | 0.488370 | 0.0102  | 2518 | 36 | 2574 | 33 | 2564 | 44 | 2518 | 36 |
| 160802-RZ1-132 | 0.167220 | 0.003810 | 11.019990 | 0.534710 | 0.470180 | 0.00928 | 2530 | 38 | 2525 | 45 | 2484 | 41 | 2530 | 38 |
| 160802-RZ1-50  | 0.171830 | 0.003970 | 11.897450 | 0.622320 | 0.486920 | 0.01031 | 2576 | 38 | 2596 | 49 | 2557 | 45 | 2576 | 38 |
| 160802-RZ1-44  | 0.179150 | 0.003810 | 12.135050 | 0.388800 | 0.490810 | 0.01016 | 2645 | 35 | 2615 | 30 | 2574 | 44 | 2645 | 35 |
| 160802-RZ1-84  | 0.197820 | 0.004240 | 14.387930 | 0.519620 | 0.532640 | 0.01071 | 2808 | 35 | 2776 | 34 | 2753 | 45 | 2808 | 35 |

## LA-ICPMS U-Pb zircon age data

| Sample          | Isotopic ratios |        |      |                                      |          |                                     |          |                                     |          |                                      | Corrected ages (Ma) |                                     |    |                                     |    |      |    |  | Used Age | 1σ |
|-----------------|-----------------|--------|------|--------------------------------------|----------|-------------------------------------|----------|-------------------------------------|----------|--------------------------------------|---------------------|-------------------------------------|----|-------------------------------------|----|------|----|--|----------|----|
|                 | Th(ppm)         | U(ppm) | Th/U | <sup>207</sup> Pb/ <sup>206</sup> Pb | 1σ       | <sup>207</sup> Pb/ <sup>235</sup> U | 1σ       | <sup>206</sup> Pb/ <sup>238</sup> U | 1σ       | <sup>207</sup> Pb/ <sup>206</sup> Pb | 1σ                  | <sup>207</sup> Pb/ <sup>235</sup> U | 1σ | <sup>206</sup> Pb/ <sup>238</sup> U | 1σ |      |    |  |          |    |
| 081703-RZ1(K1d) |                 |        |      |                                      |          |                                     |          |                                     |          |                                      |                     |                                     |    |                                     |    |      |    |  |          |    |
| 081703-RZ1-06   | 648             | 412    | 1.57 | 0.048601                             | 0.003887 | 0.109545                            | 0.009029 | 0.016372                            | 0.000275 | 128                                  | 178                 | 106                                 | 8  | 105                                 | 2  | 105  | 2  |  |          |    |
| 081703-RZ1-14   | 342             | 227    | 1.51 | 0.048533                             | 0.003344 | 0.116408                            | 0.007770 | 0.017362                            | 0.000277 | 124                                  | 156                 | 112                                 | 7  | 111                                 | 2  | 111  | 2  |  |          |    |
| 081703-RZ1-17   | 955             | 500    | 1.91 | 0.047804                             | 0.002684 | 0.112824                            | 0.006459 | 0.017038                            | 0.000236 | 100                                  | 117                 | 109                                 | 6  | 109                                 | 1  | 109  | 1  |  |          |    |
| 081703-RZ1-07   | 390             | 294    | 1.32 | 0.047623                             | 0.003272 | 0.108472                            | 0.006989 | 0.016645                            | 0.000256 | 80                                   | 156                 | 105                                 | 6  | 106                                 | 2  | 106  | 2  |  |          |    |
| 081703-RZ1-13   | 351             | 232    | 1.51 | 0.048082                             | 0.003300 | 0.107541                            | 0.006849 | 0.016427                            | 0.000286 | 102                                  | 156                 | 104                                 | 6  | 105                                 | 2  | 105  | 2  |  |          |    |
| 081703-RZ1-10   | 287             | 256    | 1.12 | 0.049715                             | 0.003079 | 0.118055                            | 0.007135 | 0.017249                            | 0.000276 | 189                                  | 144                 | 113                                 | 6  | 110                                 | 2  | 110  | 2  |  |          |    |
| 081703-RZ1-23   | 632             | 359    | 1.76 | 0.050321                             | 0.003419 | 0.122862                            | 0.007460 | 0.017992                            | 0.000237 | 209                                  | 159                 | 118                                 | 7  | 115                                 | 2  | 115  | 2  |  |          |    |
| 081703-RZ1-25   | 362             | 282    | 1.29 | 0.046709                             | 0.003174 | 0.114349                            | 0.007076 | 0.017641                            | 0.000278 | 35                                   | 156                 | 110                                 | 6  | 113                                 | 2  | 113  | 2  |  |          |    |
| 081703-RZ1-18   | 482             | 319    | 1.51 | 0.047061                             | 0.003276 | 0.109800                            | 0.007021 | 0.017095                            | 0.000243 | 54                                   | 156                 | 106                                 | 6  | 109                                 | 2  | 109  | 2  |  |          |    |
| 081703-RZ1-01   | 204             | 208    | 0.98 | 0.052401                             | 0.004838 | 0.116792                            | 0.009200 | 0.016744                            | 0.000353 | 302                                  | 213                 | 112                                 | 8  | 107                                 | 2  | 107  | 2  |  |          |    |
| 081703-RZ1-04   | 317             | 310    | 1.03 | 0.046140                             | 0.003334 | 0.099705                            | 0.006837 | 0.015844                            | 0.000339 | 400                                  | -231                | 97                                  | 6  | 101                                 | 2  | 101  | 2  |  |          |    |
| 081703-RZ1-11   | 283             | 238    | 1.19 | 0.046484                             | 0.003834 | 0.109654                            | 0.007661 | 0.017227                            | 0.000298 | 33                                   | 176                 | 106                                 | 7  | 110                                 | 2  | 110  | 2  |  |          |    |
| 081703-RZ1-22   | 304             | 270    | 1.12 | 0.051583                             | 0.004087 | 0.118837                            | 0.008097 | 0.017122                            | 0.000240 | 333                                  | 181                 | 114                                 | 7  | 109                                 | 2  | 109  | 2  |  |          |    |
| 081703-RZ1-24   | 381             | 260    | 1.47 | 0.050985                             | 0.003769 | 0.117889                            | 0.007992 | 0.016848                            | 0.000284 | 239                                  | 203                 | 113                                 | 7  | 108                                 | 2  | 108  | 2  |  |          |    |
| 081703-RZ1-16   | 207             | 192    | 1.08 | 0.052469                             | 0.004393 | 0.124388                            | 0.009031 | 0.017617                            | 0.000297 | 306                                  | 193                 | 119                                 | 8  | 113                                 | 2  | 113  | 2  |  |          |    |
| 081703-RZ1-03   | 349             | 236    | 1.48 | 0.052138                             | 0.004027 | 0.118362                            | 0.008384 | 0.016588                            | 0.000301 | 300                                  | 176                 | 114                                 | 8  | 106                                 | 2  | 106  | 2  |  |          |    |
| 081703-RZ1-05   | 529             | 330    | 1.60 | 0.052210                             | 0.003177 | 0.122018                            | 0.006914 | 0.017054                            | 0.000242 | 295                                  | 139                 | 117                                 | 6  | 109                                 | 2  | 109  | 2  |  |          |    |
| 081703-RZ1-12   | 308             | 261    | 1.18 | 0.053105                             | 0.003430 | 0.130695                            | 0.007594 | 0.018217                            | 0.000297 | 332                                  | 142                 | 125                                 | 7  | 116                                 | 2  | 116  | 2  |  |          |    |
| 081703-RZ1-15   | 158             | 141    | 1.12 | 0.046452                             | 0.004529 | 0.106377                            | 0.008452 | 0.017062                            | 0.000333 | 20                                   | 218                 | 103                                 | 8  | 109                                 | 2  | 109  | 2  |  |          |    |
| 081703-RZ1-19   | 380             | 255    | 1.49 | 0.047194                             | 0.003946 | 0.111274                            | 0.006909 | 0.017849                            | 0.000298 | 58                                   | 198                 | 107                                 | 6  | 114                                 | 2  | 114  | 2  |  |          |    |
| 081703-RZ1-21   | 473             | 305    | 1.55 | 0.051502                             | 0.003077 | 0.121519                            | 0.006728 | 0.017102                            | 0.000276 | 265                                  | 137                 | 116                                 | 6  | 109                                 | 2  | 109  | 2  |  |          |    |
| 081703-RZ1-20   | 259             | 229    | 1.13 | 0.052076                             | 0.003004 | 0.128850                            | 0.007197 | 0.017863                            | 0.000307 | 287                                  | 133                 | 123                                 | 6  | 114                                 | 2  | 114  | 2  |  |          |    |
| 081703-RZ1-02   | 414             | 277    | 1.50 | 0.052994                             | 0.004669 | 0.119221                            | 0.010004 | 0.016189                            | 0.000268 | 328                                  | 197                 | 114                                 | 9  | 104                                 | 2  | 104  | 2  |  |          |    |
| 081703-RZ1-08   | 399             | 301    | 1.33 | 0.052987                             | 0.005154 | 0.120725                            | 0.010892 | 0.016414                            | 0.000282 | 328                                  | 250                 | 116                                 | 10 | 105                                 | 2  | 105  | 2  |  |          |    |
| 081703-RZ1-09   | 325             | 268    | 1.21 | 0.054774                             | 0.003968 | 0.122602                            | 0.007386 | 0.016687                            | 0.000283 | 467                                  | 168                 | 117                                 | 7  | 107                                 | 2  | 107  | 2  |  |          |    |
| 081103-RZ1      |                 |        |      |                                      |          |                                     |          |                                     |          |                                      |                     |                                     |    |                                     |    |      |    |  |          |    |
| 081103-RZ1-02   | 191             | 185    | 1.03 | 0.047380                             | 0.004082 | 0.108035                            | 0.008580 | 0.016290                            | 0.000302 | 78                                   | 183                 | 104                                 | 8  | 104                                 | 2  | 104  | 2  |  |          |    |
| 081103-RZ1-11   | 202             | 211    | 0.96 | 0.047175                             | 0.003787 | 0.109237                            | 0.008287 | 0.016595                            | 0.000320 | 58                                   | 181                 | 105                                 | 8  | 106                                 | 2  | 106  | 2  |  |          |    |
| 081103-RZ1-04   | 89              | 128    | 0.69 | 0.048991                             | 0.005045 | 0.106879                            | 0.009564 | 0.015867                            | 0.000353 | 146                                  | 226                 | 103                                 | 9  | 101                                 | 2  | 101  | 2  |  |          |    |
| 081103-RZ1-15   | 98              | 133    | 0.74 | 0.049635                             | 0.005417 | 0.106432                            | 0.009783 | 0.016228                            | 0.000408 | 189                                  | 224                 | 103                                 | 9  | 104                                 | 3  | 104  | 3  |  |          |    |
| 081103-RZ1-18   | 107             | 136    | 0.78 | 0.048651                             | 0.005218 | 0.112401                            | 0.010024 | 0.016669                            | 0.000360 | 132                                  | 233                 | 108                                 | 9  | 107                                 | 2  | 107  | 2  |  |          |    |
| 081103-RZ1-21   | 112             | 145    | 0.77 | 0.051017                             | 0.005049 | 0.109571                            | 0.009429 | 0.016231                            | 0.000322 | 243                                  | 211                 | 106                                 | 9  | 104                                 | 2  | 104  | 2  |  |          |    |
| 081103-RZ1-01   | 79              | 112    | 0.71 | 0.049968                             | 0.004881 | 0.117987                            | 0.008952 | 0.018227                            | 0.000415 | 195                                  | 211                 | 113                                 | 8  | 116                                 | 3  | 116  | 3  |  |          |    |
| 081103-RZ1-07   | 77              | 119    | 0.65 | 0.051189                             | 0.006171 | 0.113526                            | 0.012488 | 0.016738                            | 0.000386 | 250                                  | 256                 | 109                                 | 11 | 107                                 | 2  | 107  | 2  |  |          |    |
| 081103-RZ1-16   | 132             | 156    | 0.84 | 0.050811                             | 0.004772 | 0.111241                            | 0.009140 | 0.016310                            | 0.000315 | 232                                  | 204                 | 107                                 | 8  | 104                                 | 2  | 104  | 2  |  |          |    |
| 081103-RZ1-19   | 85              | 124    | 0.69 | 0.050682                             | 0.004662 | 0.114763                            | 0.009373 | 0.016857                            | 0.000397 | 233                                  | 200                 | 110                                 | 9  | 108                                 | 3  | 108  | 3  |  |          |    |
| 081103-RZ1-14   | 111             | 144    | 0.77 | 0.048291                             | 0.004561 | 0.105724                            | 0.008011 | 0.016583                            | 0.000343 | 122                                  | 202                 | 102                                 | 7  | 106                                 | 2  | 106  | 2  |  |          |    |
| 081103-RZ1-12   | 93              | 129    | 0.72 | 0.051915                             | 0.004282 | 0.126609                            | 0.008787 | 0.018042                            | 0.000397 | 283                                  | 191                 | 121                                 | 8  | 115                                 | 3  | 115  | 3  |  |          |    |
| 081103-RZ1-20   | 156             | 187    | 0.83 | 0.051777                             | 0.003960 | 0.110363                            | 0.007317 | 0.015907                            | 0.000281 | 256                                  | 178                 | 106                                 | 7  | 102                                 | 2  | 102  | 2  |  |          |    |
| 081103-RZ1-22   | 91              | 118    | 0.77 | 0.047705                             | 0.005719 | 0.097049                            | 0.009695 | 0.015425                            | 0.000336 | 83                                   | 263                 | 94                                  | 9  | 99                                  | 2  | 99   | 2  |  |          |    |
| 081103-RZ1-03   | 49              | 84     | 0.58 | 0.046296                             | 0.006247 | 0.109623                            | 0.010443 | 0.017494                            | 0.000542 | 13                                   | 296                 | 106                                 | 10 | 112                                 | 3  | 112  | 3  |  |          |    |
| 081103-RZ1-06   | 91              | 134    | 0.68 | 0.046342                             | 0.005939 | 0.097995                            | 0.010519 | 0.015636                            | 0.000467 | 17                                   | 281                 | 95                                  | 10 | 100                                 | 3  | 100  | 3  |  |          |    |
| 081103-RZ1-09   | 131             | 167    | 0.79 | 0.051484                             | 0.004684 | 0.119631                            | 0.009735 | 0.016924                            | 0.000365 | 261                                  | 209                 | 115                                 | 9  | 108                                 | 2  | 108  | 2  |  |          |    |
| 081103-RZ1-17   | 122             | 164    | 0.74 | 0.052943                             | 0.004241 | 0.114272                            | 0.007922 | 0.015972                            | 0.000361 | 328                                  | 149                 | 110                                 | 7  | 102                                 | 2  | 102  | 2  |  |          |    |
| 081103-RZ1-24   | 84              | 121    | 0.70 | 0.046575                             | 0.004614 | 0.096837                            | 0.007130 | 0.015857                            | 0.000354 | 28                                   | 222                 | 94                                  | 7  | 101                                 | 2  | 101  | 2  |  |          |    |
| 081103-RZ1-25   | 88              | 120    | 0.73 | 0.046857                             | 0.004459 | 0.101460                            | 0.006986 | 0.016516                            | 0.000320 | 43                                   | 211                 | 98                                  | 6  | 106                                 | 2  | 106  | 2  |  |          |    |
| 081103-RZ1-04   | 67              | 117    | 0.57 | 0.054704                             | 0.007243 | 0.116787                            | 0.013642 | 0.016080                            | 0.000431 | 467                                  | 300                 | 112                                 | 12 | 103                                 | 3  | 103  | 3  |  |          |    |
| 081103-RZ1-10   | 96              | 136    | 0.70 | 0.053348                             | 0.005531 | 0.114694                            | 0.009391 | 0.015834                            | 0.000384 | 343                                  | 231                 | 110                                 | 9  | 101                                 | 2  | 101  | 2  |  |          |    |
| 081103-RZ1-05   | 93              | 130    | 0.71 | 0.055584                             | 0.006402 | 0.123336                            | 0.011634 | 0.016726                            | 0.000487 | 435                                  | 253                 | 118                                 | 11 | 107                                 | 3  | 107  | 3  |  |          |    |
| 081103-RZ1-13   | 134             | 158    | 0.85 | 0.053374                             | 0.006111 | 0.131535                            | 0.013334 | 0.017859                            | 0.000449 | 346                                  | 261                 | 125                                 | 12 | 114                                 | 3  | 114  | 3  |  |          |    |
| 081103-RZ1-23   | 436             | 674    | 0.65 | 0.054785                             | 0.002704 | 0.152510                            | 0.006827 | 0.020447                            | 0.000298 | 467                                  | 105                 | 144                                 | 6  | 130                                 | 2  | 130  | 2  |  |          |    |
| 080405-RZ1      |                 |        |      |                                      |          |                                     |          |                                     |          |                                      |                     |                                     |    |                                     |    |      |    |  |          |    |
| 080405-RZ1-01   | 326             | 284    | 1.15 | 0.056944                             | 0.002370 | 0.382260                            | 0.011866 | 0.048837                            | 0.000802 | 500                                  | 94                  | 329                                 | 9  | 307                                 | 5  | 307  | 5  |  |          |    |
| 080405-RZ1-02   | 559             | 912    | 0.61 | 0.073780                             | 0.000427 | 1.447932                            | 0.017528 | 0.142323                            | 0.001838 | 1035                                 | 11                  | 909                                 | 8  | 858                                 | 10 | 858  | 10 |  |          |    |
| 080405-RZ1-03   | 9161            | 43032  | 0.21 | 0.112482                             | 0.001987 | 0.069362                            | 0.001641 | 0.004470                            | 0.000055 | 1840                                 | 31                  | 68                                  | 2  | 29                                  | 0  | 29   | 0  |  |          |    |
| 080405-RZ1-04   | 9261            | 46646  | 0.20 | 0.051654                             | 0.000255 | 0.038375                            | 0.000634 | 0.005387                            | 0.000085 | 333                                  | 11                  | 38                                  | 1  | 35                                  | 1  | 35   | 1  |  |          |    |
| 080405-RZ1-05   | 236             | 279    | 0.84 | 0.125751                             | 0.000541 | 6.514868                            | 0.136061 | 0.375630                            | 0.007763 | 2039                                 | 9                   | 2048                                | 19 | 2056                                | 36 | 2039 | 9  |  |          |    |
| 080405-RZ1-06   | 588             | 396    | 1.48 | 0.062509                             | 0.006990 | 0.056769                            | 0.006461 | 0.006195                            | 0.000127 | 813                                  | 219                 | 56                                  | 6  | 40                                  | 1  | 40   | 1  |  |          |    |
| 080405-RZ1-07   | 120             | 110    | 1.09 | 0.089550                             | 0.000517 | 3.206651                            | 0.064891 | 0.259648                            | 0.005219 | 1417                                 | 11                  | 1459                                | 16 | 1488                                | 27 | 1417 | 11 |  |          |    |
| 080405-RZ1-08   | 11361           | 56794  | 0.20 | 0.173502                             |          |                                     |          |                                     |          |                                      |                     |                                     |    |                                     |    |      |    |  |          |    |
