# Supplementary material
Source: publisher figshare collection journal article supplement (https://tandf.figshare.com/articles/dataset/_/11357588)
Supplement: Supplementary file 3 [file 1]

| Sample information |               |                |                  |                |               |           |             |
|--------------------|---------------|----------------|------------------|----------------|---------------|-----------|-------------|
| No.                | Sample number | Lithology      | Formation        | Longitude (°E) | Latitude (°N) | Petrology | Zircon U-Pb |
| 1                  | 080902-b1     | Meta-sandstone | ∈                | 87°25'32.47"   | 31°26'05.85"  | ✓         |             |
| 2                  | 080903-b1     | Meta-sandstone | ∈                | 87°26'55.59"   | 31°27'36.58"  | ✓         |             |
| 3                  | 081101-b1     | Meta-sandstone | ∈                | 86°46'29.44"   | 31°37'18.68"  | ✓         |             |
| 4                  | 081801-b1     | Meta-sandstone | ∈                | 85°52'24.25"   | 31°41'50.75"  | ✓         | ✓           |
| 5                  | 080406-b1     | sandstone      | T <sub>3</sub> m | 86°42'43.56"   | 32°16'52.32"  | ✓         | ✓           |
| 6                  | 080602-b1     | sandstone      | T <sub>3</sub> m | 86°56'06.72"   | 32°16'11.64"  | ✓         | ✓           |
| 7                  | 081003-b1     | sandstone      | T <sub>3</sub> m | 87°04'03.72"   | 32°16'52.32"  | ✓         | ✓           |
| 8                  | 080801-b1     | sandstone      | K <sub>1</sub> s | 86°50'39.50"   | 32°00'41.91"  | ✓         |             |
| 9                  | 080801-b2     | sandstone      | K <sub>1</sub> s | 86°45'25.62"   | 32°00'16.07"  | ✓         |             |
| 10                 | 081105-b1     | sandstone      | K <sub>1</sub> s | 86°33'02.87"   | 31°54'51.78"  | ✓         |             |
| 11                 | 081301-b1     | sandstone      | K <sub>1</sub> s | 86°21'12.33"   | 31°59'36.55"  | ✓         |             |
| 12                 | 081302-b1     | sandstone      | K <sub>1</sub> s | 86°22'14.95"   | 32°00'15.62"  | ✓         | ✓           |
| 13                 | 081306-b1     | sandstone      | K <sub>1</sub> d | 85°56'14.33"   | 31°48'17.24"  | ✓         |             |
| 14                 | 081401-b1     | sandstone      | K <sub>1</sub> d | 86°06'18.58"   | 31°44'18.99"  | ✓         | ✓           |
| 15                 | 081502-b1     | sandstone      | K <sub>1</sub> d | 86°00'51.38"   | 31°41'40.25"  | ✓         |             |
| 16                 | 081802-b1     | sandstone      | K <sub>1</sub> d | 85°54'31.15"   | 31°44'08.75"  | ✓         | ✓           |
| 17                 | 173101-b1     | sandstone      | K <sub>2</sub> a | 87°16'23.10"   | 32°01'19.72"  | ✓         | ✓           |
| 18                 | 080304-b1     | sandstone      | K <sub>2</sub> a | 86°38'22.70"   | 32°27'28.00"  | ✓         | ✓           |
| 19                 | 081004-b1     | sandstone      | K <sub>2</sub> a | 87°09'45.39"   | 32°07'09.57"  | ✓         |             |
| 20                 | 081005-b1     | sandstone      | K <sub>2</sub> a | 87°02'33.89"   | 32°10'42.42"  | ✓         |             |
| 21                 | 081006-b1     | sandstone      | K <sub>2</sub> a | 87°16'58.48"   | 32°02'39.98"  | ✓         |             |
| 22                 | 160801-b1     | siltstone      | K <sub>2</sub> a | 86°35'53.50"   | 32°29'30.90"  | ✓         | ✓           |
| 23                 | 160802-b1     | sandstone      | K <sub>2</sub> a | 86°42'08.00"   | 32°34'55.00"  | ✓         | ✓           |
